# Supplementary material for: Integrating genomics and metabolomics for scalable non-ribosomal peptide discovery
Source: PubMed Central journal article supplement (PMC8163882; doi:10.1038/s41467-021-23502-4), 2021-05-28
Supplement: 41467_2021_23502_MOESM1_ESM.pdf [file 41467_2021_23502_MOESM1_ESM.pdf]

## **Supplementary Information**

# **Integrating Genomics and Metabolomics for Scalable Non-Ribosomal Peptide Discovery**

Bahar Behsaz<sup>\*,1,2,11</sup>, Edna Bode<sup>\*,3</sup>, Alexey Gurevich<sup>4</sup>, Yan-Ni Shi<sup>3</sup>, Florian Grundmann<sup>3</sup>, Deepa Archarya<sup>5</sup>, Andrés Mauricio Caraballo-Rodríguez<sup>6</sup>, Amina Bouslimani<sup>6</sup>, Morgan Panitchpakdi<sup>6</sup>, Annabell Linck<sup>3</sup>, Changhui Guan<sup>7</sup>, Julia Oh<sup>7</sup>, Pieter C. Dorrestein<sup>2,6</sup>, Helge B. Bode<sup>3,8,9,+</sup>, Pavel A. Pevzner<sup>2,10,+</sup>, Hosein Mohimani<sup>11,+</sup>

<sup>1</sup> Bioinformatics and Systems Biology Program, University of California San Diego, La Jolla, USA

<sup>2</sup> Center for Microbiome Innovation, University of California at San Diego, La Jolla, USA

<sup>3</sup> Molecular Biotechnology, Department of Biosciences, Goethe University Frankfurt, Frankfurt am Main, Germany

<sup>4</sup> Center for Algorithmic Biotechnology, Institute of Translational Biomedicine, St. Petersburg State University, St Petersburg, Russia

<sup>5</sup> Tiny Earth Chemistry Hub, University of Wisconsin–Madison, Madison, USA

<sup>6</sup> Collaborative Mass Spectrometry Innovation Center, Skaggs School of Pharmacy and Pharmaceutical Sciences, University of California San Diego, La Jolla, USA

<sup>7</sup> The Jackson Laboratory of Medical Genomics, Farmington, USA

<sup>8</sup> Buchmann Institute for Molecular Life Sciences (BMLS), Goethe University Frankfurt & Senckenberg Research Institute, Frankfurt am Main, Germany

<sup>9</sup> Max-Planck-Institute for Terrestrial Microbiology, Department for Natural Products in Organismic Interactions, Marburg, Germany

<sup>10</sup> Department of Computer Science and Engineering, University of California San Diego, La Jolla, USA

<sup>11</sup> Computational Biology Department, School of Computer Science, Carnegie Mellon University, Pittsburgh, USA.

+ Correspondence: helge.bode@mpi-marburg.mpg.de, ppevzner@ucsd.edu, hoseinm@andrew.cmu.edu.

**Supplementary Figures 1-32**

**Supplementary Tables 1-13**

## Supplementary Figures

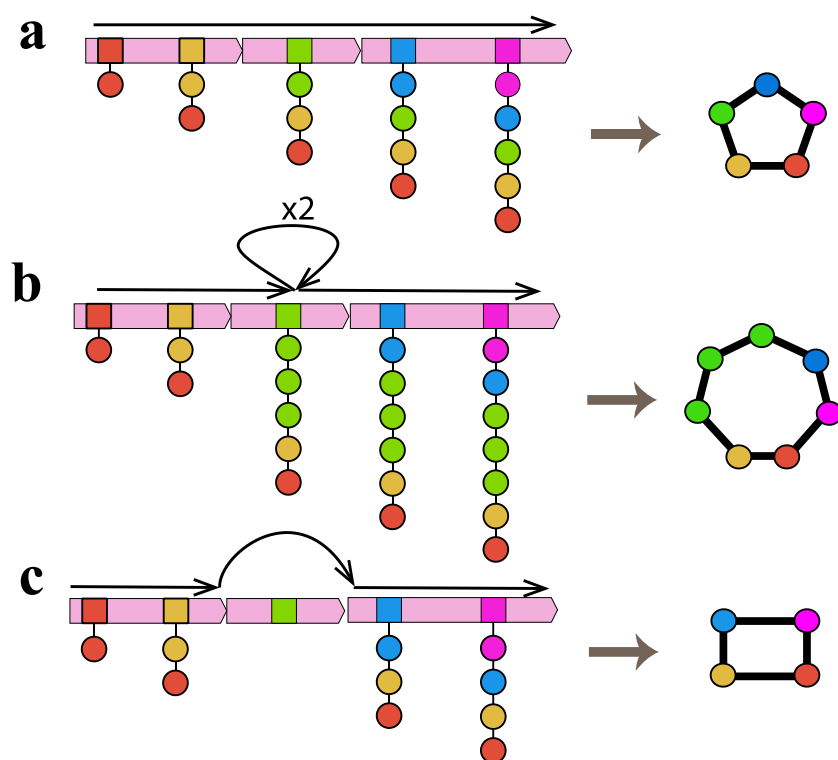

**Supplementary Figure 1. Schematic examples of canonical and non-canonical NRPS assembly lines.** Squares represent A-domains and circles represent amino acids (different amino acids are shown by different colors). Each amino acid is colored by the same color as the corresponding A-domain. In each panel, the final NRP is represented by its amino acids with amide bonds shown with black lines. **(a)** A canonical assembly line where each A-domain adds one amino acid to the growing structure. **(b)** A non-canonical assembly line where a single A-domain (on one ORF) loads a series of three amino acids (the loop shows the repeat of A-domain on the assembly line) to the growing structure also referred to as stuttering in polyketide synthases<sup>1,2</sup>. **(c)** A non-canonical assembly line where the A-domain appearing on one ORF is skipped in the final NRP.

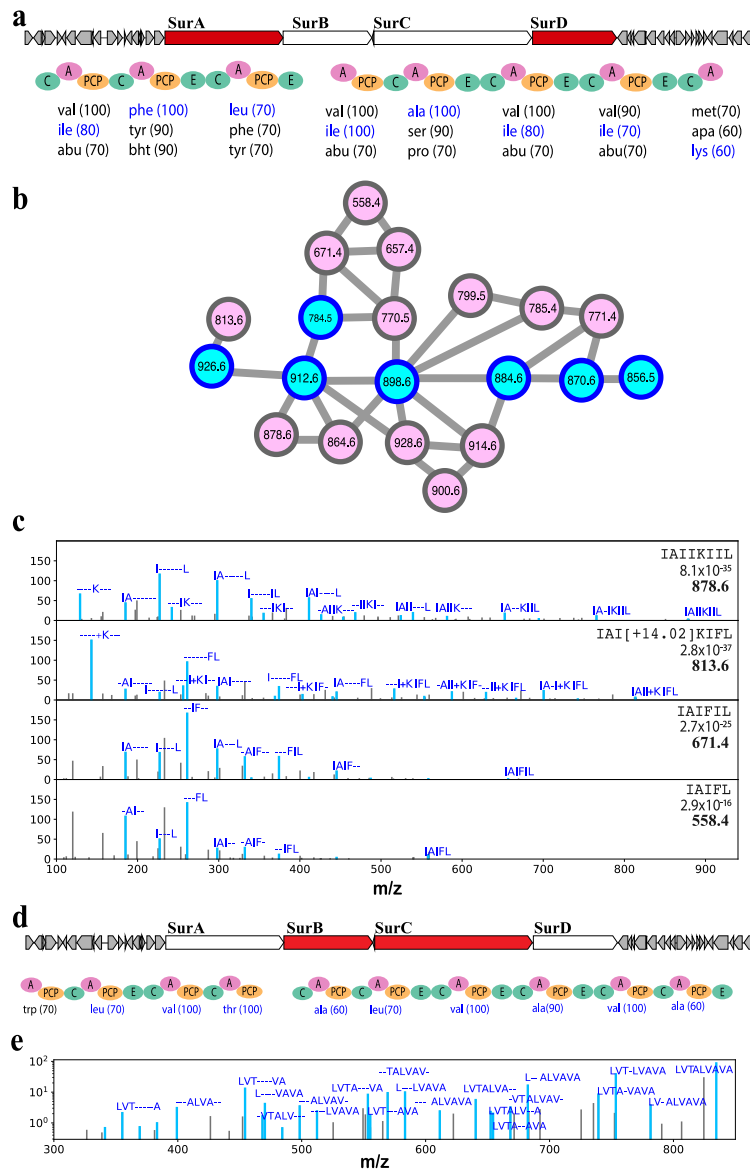

**Supplementary Figure 2. Known and novel surugamide variants identified by NRPminer in the SoilActi dataset.** Surugamide BGC contains four successive genes, namely SurA, SurB, SurC, and SurD with five, four, six, and three A-domains, respectively. SurA and SurD synthesize cyclic surugamides A-D using a non-canonical assembly line, while SurB and SurC synthesize a linear surugamide F. **(a)** Surugamide BGC from *S. albus* with SurA and SurD highlighted in red, while SurB and SurC are shown in white. In the middle, A-, C-, PCP-, and E-domains appearing in the corresponding NRPS are shown. Three highest-scoring amino acids for each A-domain in this NRPS (according to NRPSPredictor<sup>23</sup> predictions) are shown below the corresponding A-domains. Amino acids appearing in surugamide A (IFLIAIK) are shown in blue. **(b)** Spectral network formed by spectra that originated from cyclic surugamides (corresponding to the NRPS shown in part a) including the seven known cyclic surugamides. The known cyclic surugamides are shown in blue, while the purple nodes represent the novel cyclic variants identified by NRPminer. **(c)** NRPminer predicted novel cyclic surugamides with eight, seven, six, and five amino acids. For each length, the annotated spectrum representing the lowest p-value (among all PSMs corresponding to the identified novel surugamides with that length) is

presented. Amino acid sequence, p-value, and precursor mass of each PSM is shown in the top right corner. The p-values are computed based on MCMC approach using MS-DPR<sup>4</sup> with 10000 simulations. Annotated peaks are shown in blue. The spectra were annotated based on predicted NRPs IAIKIL, IAIKIFL, IAIFIL, IAIFL, from top to bottom. The "+" sign represents the addition of [+14.02Da]. Supplementary Table 8 shows the predicted amino acids and p-values for all NRPs represented by the nodes in part **b**. **(d)** Surugamide BGC from *S. albus* with SurB and SurC highlighted in red, while SurA and SurD are shown in white. In the middle, A-, C-, PCP-, and E-domains appearing in the corresponding NRPS are shown. The highest-scoring amino acids for each A-domain in this NRPS (according to NRSPredictor2<sup>3</sup> predictions) are shown below the corresponding A-domains. Amino acids appearing in the novel surugamide G (LVTALVAVA) are shown in blue. The amino acid shown in black did not appear in the predicted surugamide G. **(e)** Annotated spectrum representing the novel surugamide G (synthesized by the NRPS shown in part **d**) with the lowest p-value among all spectra representing this NRP (p-value=5.0× 10<sup>-46</sup>). Annotated peaks are shown in blue.

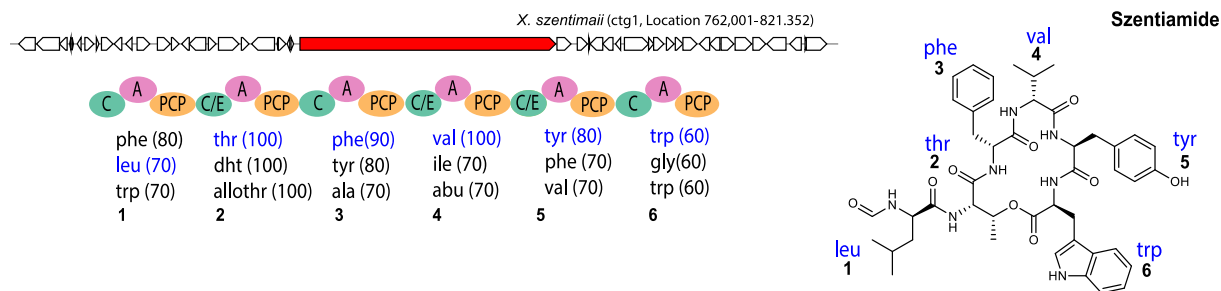

**Supplementary Figure 3. Szentiamide biosynthetic gene clusters.** (Left) szentiamide BGC in *Xenorhabdus szentirmaii* DSM 16338 with NRPS genes (shown in red) which is consistent with the previous study<sup>5</sup>. Three highest scoring NRPSpredictor<sup>23</sup> amino acid predictions for each A-domain in these BGC are shown. Amino acids corresponding to the correct structure are shown in blue. NRPminer identified this NRP with p-value  $7.0 \times 10^{-31}$ . The p-values are computed based on MCMC approach using MS-DPR<sup>4</sup> with 10000 simulations. (Right) The structure of the szentiamide is shown with amino acids highlighted in blue.

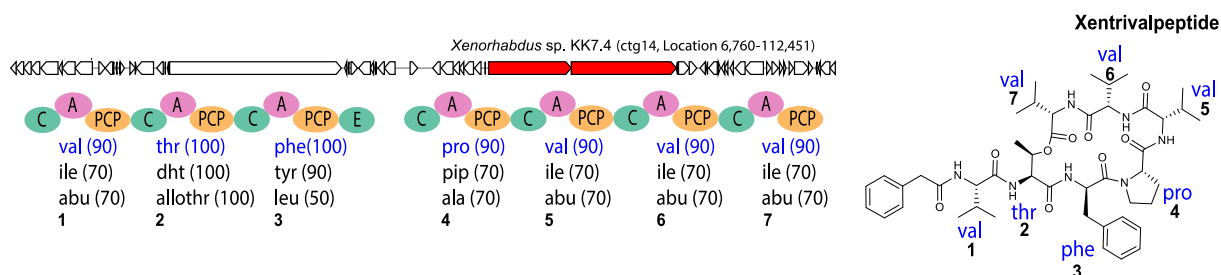

**Supplementary Figure 4. Predicted xentrivalpeptide biosynthetic gene clusters.** (Left) The BGC in *Xenorhabdus* sp. KK7.4 predicted to encode xentrivalpeptide with NRPS genes (shown in red). Three highest scoring NRPSpredictor<sup>23</sup> amino acid predictions for each A-domain in these BGCs are shown. Amino acids corresponding to the correct structure are shown in blue. NRPminer identified this NRP with p-value  $6.4 \times 10^{-37}$ . The p-values are computed based on MCMC approach using MS-DPR<sup>4</sup> with 10000 simulations. (Right) The structure of xentrivalpeptide is shown with amino acids highlighted in blue.

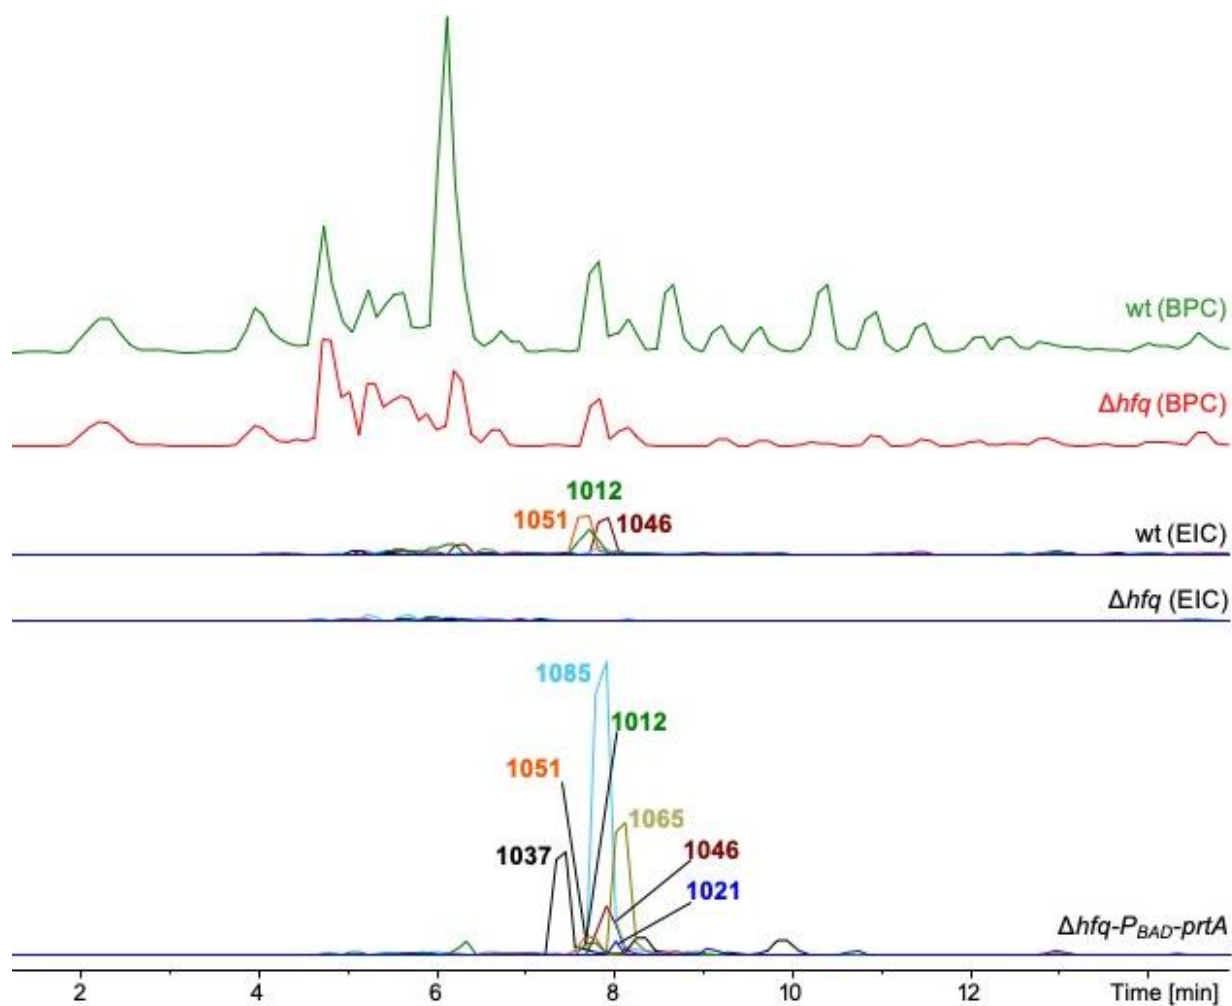

**Supplementary Figure 5. (Top)** Base peak chromatogram (BPC) of *X. doucetiae* wt (green) and *X. doucetiae*- $\Delta hfq$  (red) crude extracts. **(Bottom)** Extracted ion chromatograms (EIC) of PRT derivatives from the extract of induced *X. doucetiae*- $\Delta hfq$ - $P_{BAD}$ -prtA.

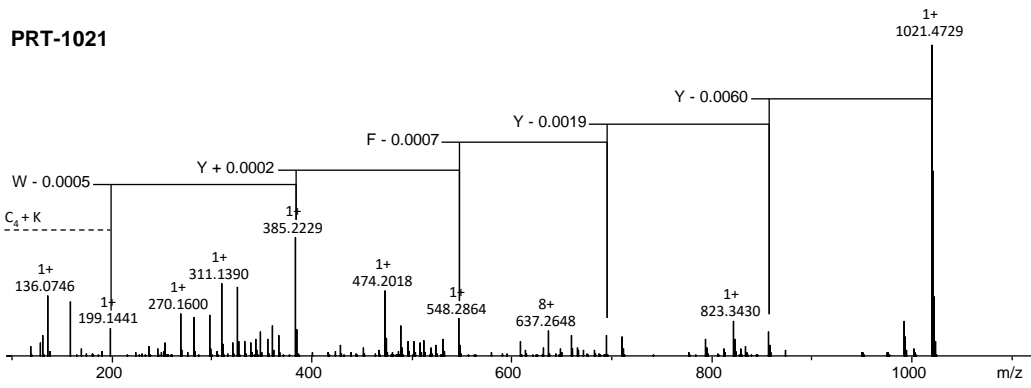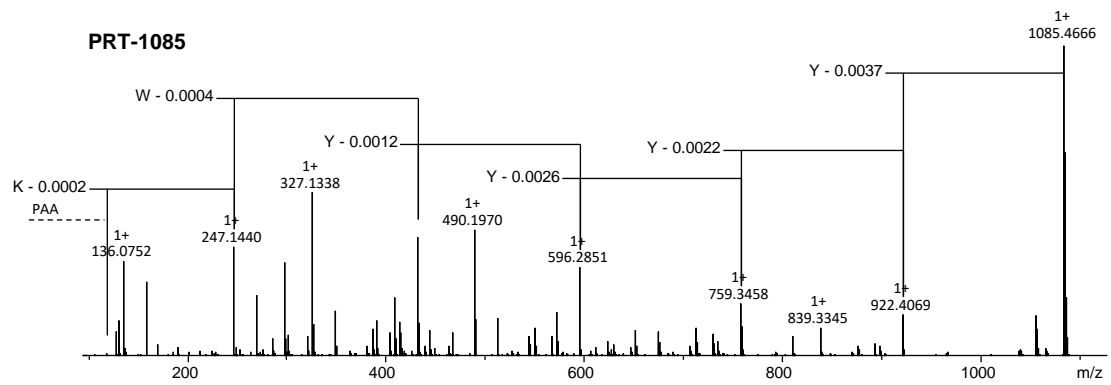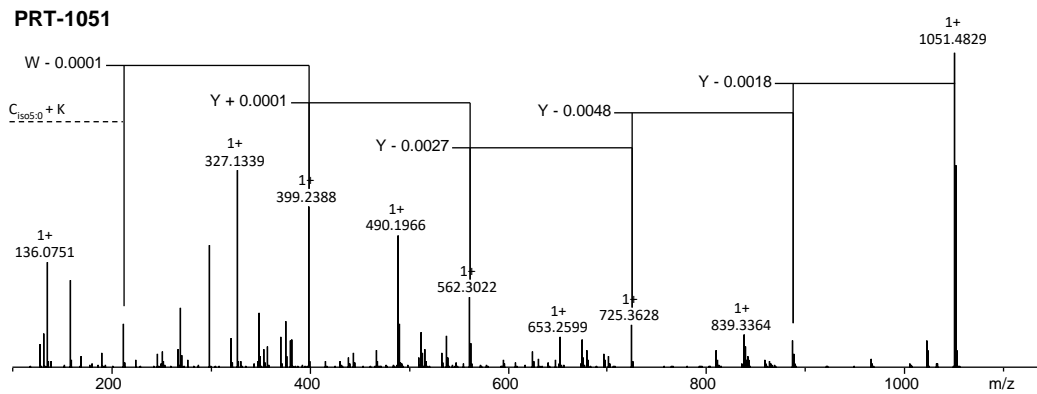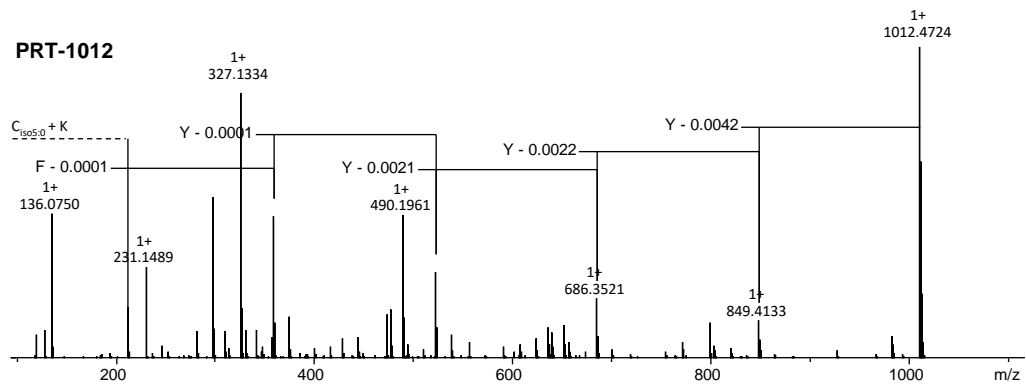

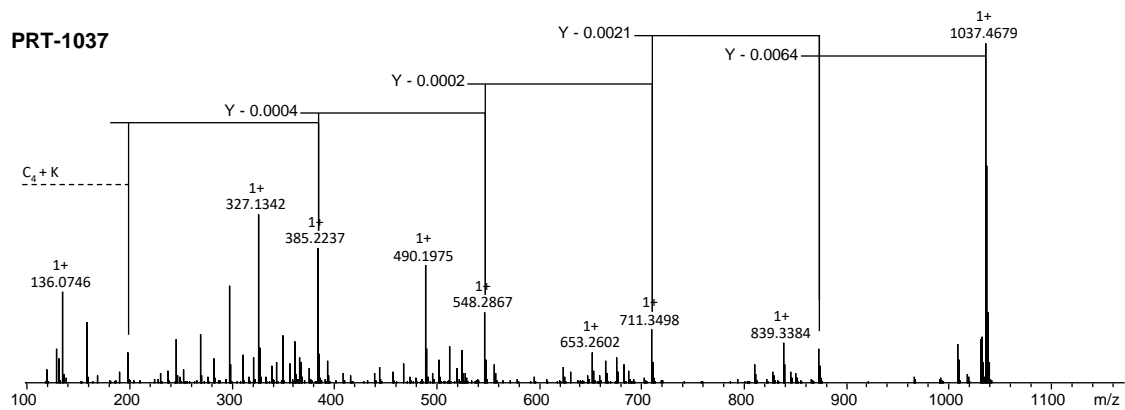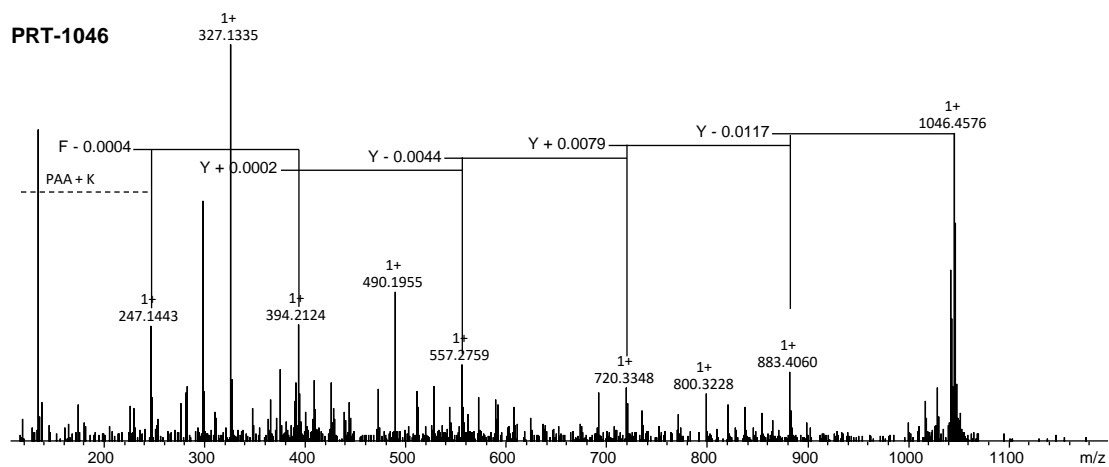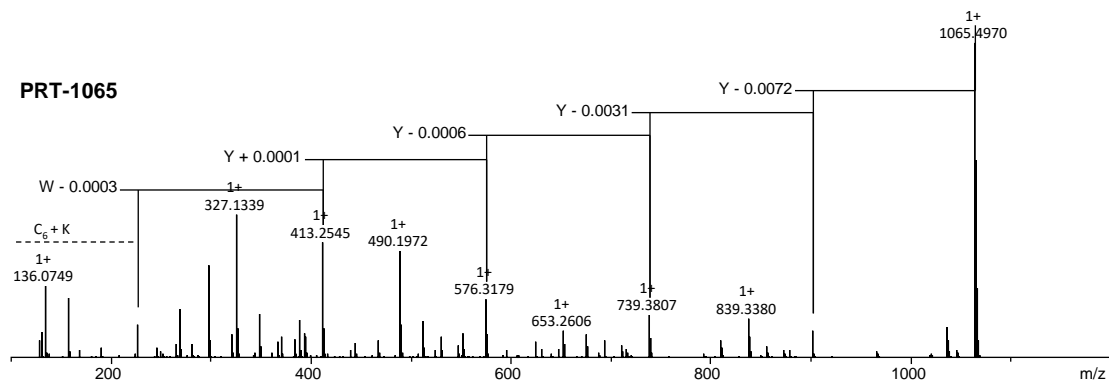

**Supplementary Figure 6. Fragmentation pattern (MS/MS of the molecular ions) of selected PRT derivatives from *X. doucetiae* observed by HPLC-MS analysis.**



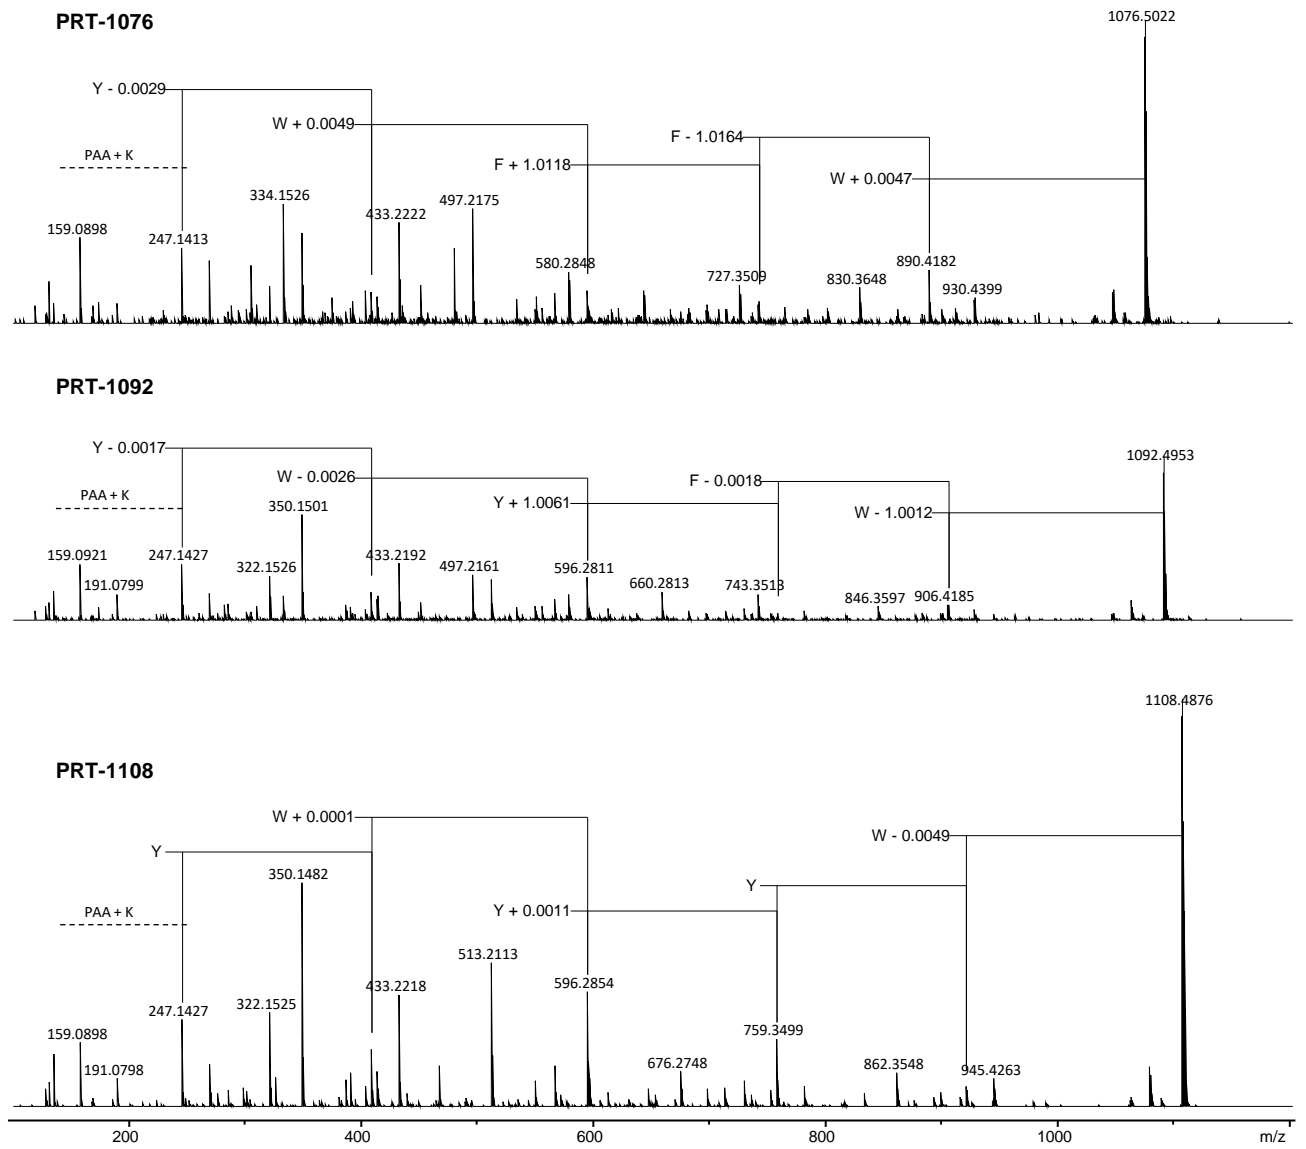

**Supplementary Figure 7. Fragmentation pattern (MS/MS of the molecular ions) of selected PRT derivatives from *Xenorhabdus* sp. 30TX1 observed by HPLC-MS analysis.**

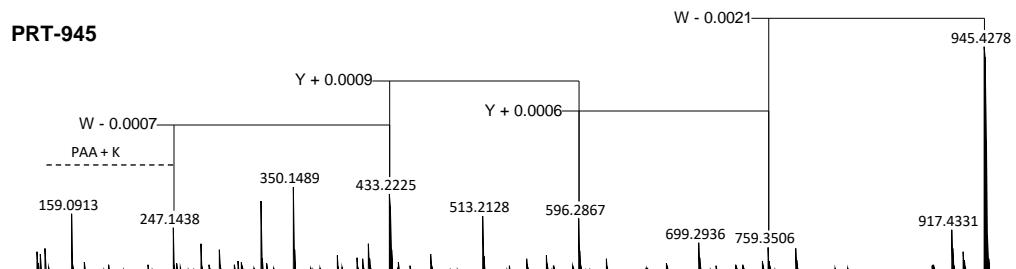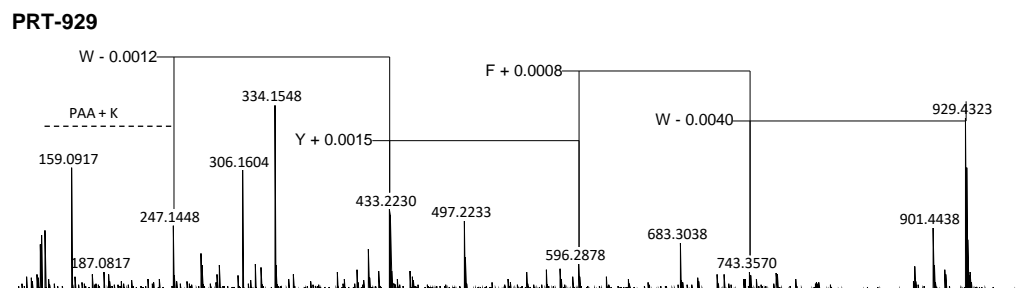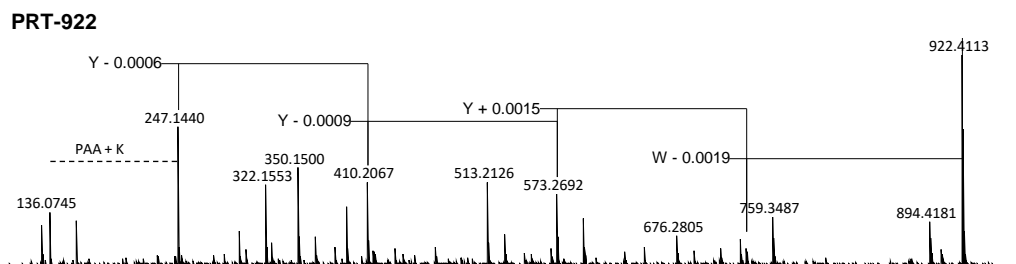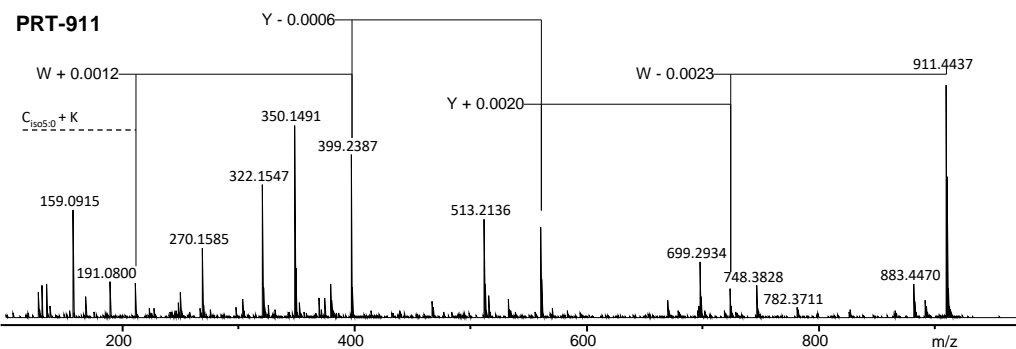

**Supplementary Figure 8. Fragmentation pattern (MS/MS of the molecular ions) of selected PRT derivatives from *X. poinarii* observed by HPLC-MS analysis.**

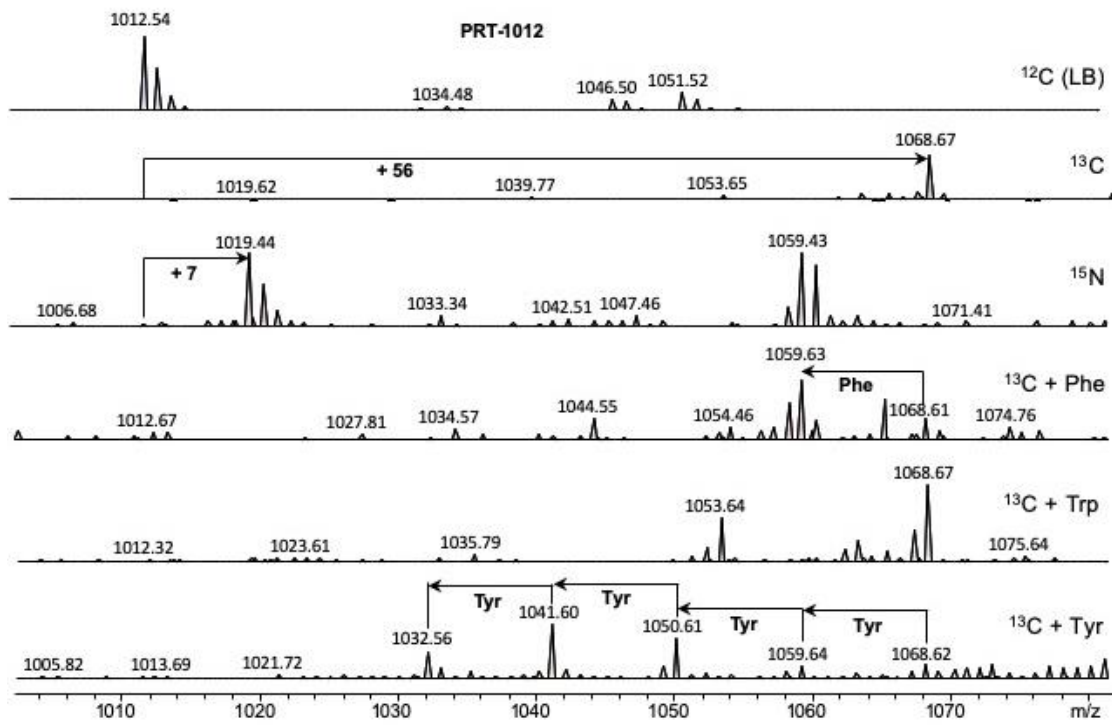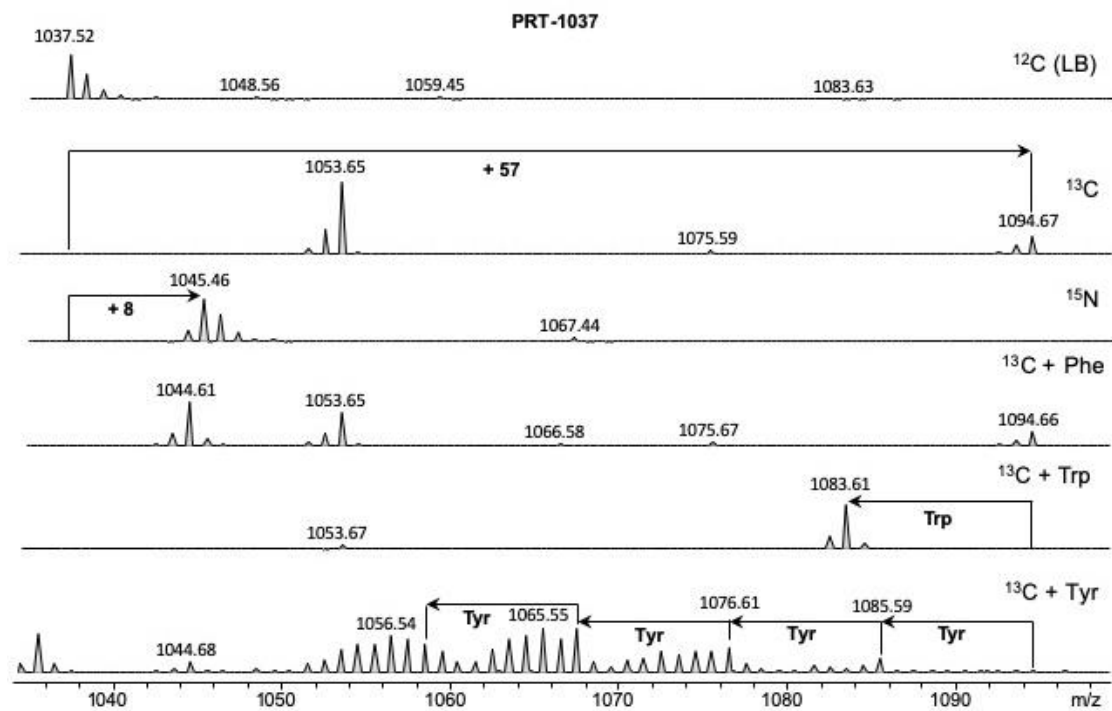

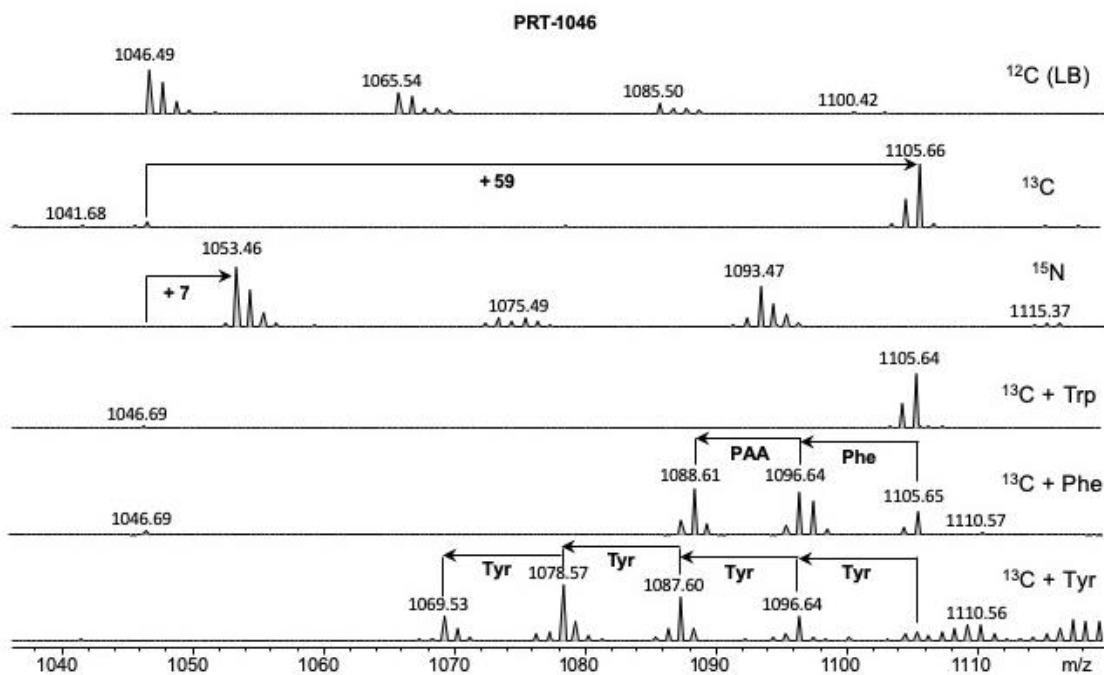

**Supplementary Figure 9. MS analysis of selected PRT derivatives after cultivation in  $^{12}\text{C}$  (LB),  $^{13}\text{C}$ - and  $^{15}\text{N}$ - medium.** Analysis of the incorporation of non-labelled Phe, Trp, Tyr and Leu added to fully labeled  $^{13}\text{C}$  medium.

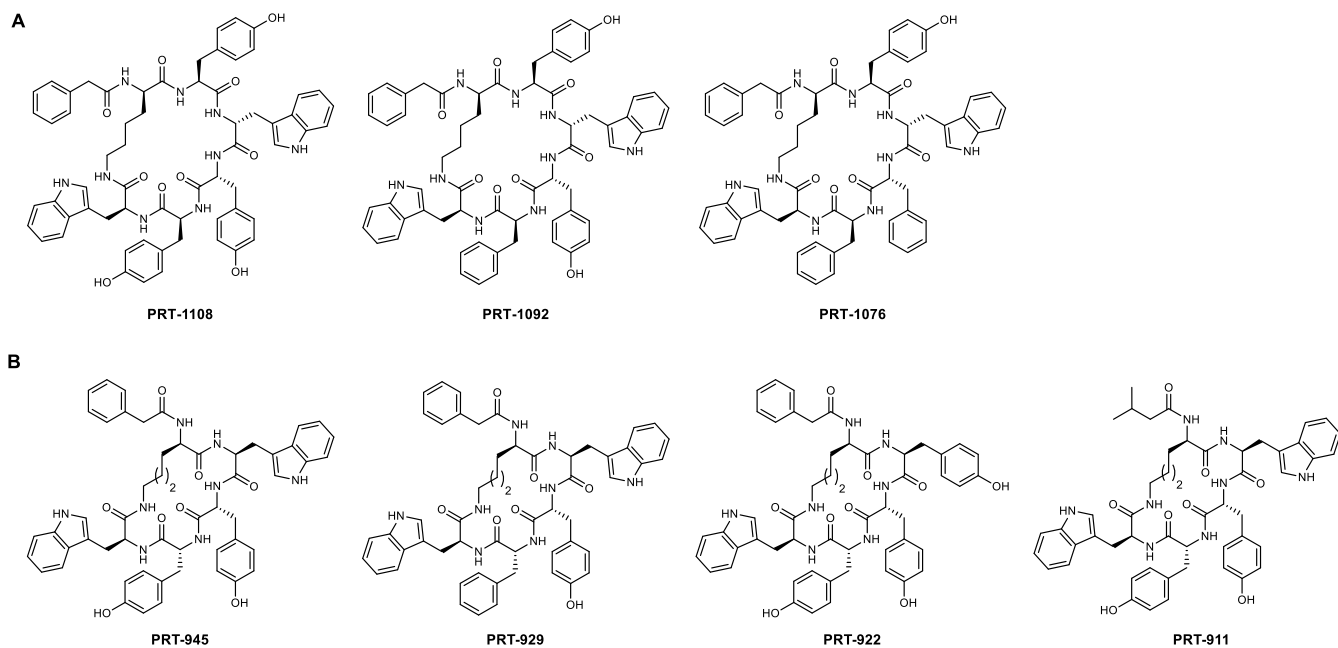

**Supplementary Figure 10. (A)** Predicted structures of PRT derivatives produced by *Xenorhabdus* sp. 30TX1 including amino acid configuration as found in *X. doucetiae*. **(B)** Predicted structures for PRT derivatives produced by *X. poinarii* including amino acid configuration as concluded from the presence of epimerization domains in the corresponding NRPS PrtAB.

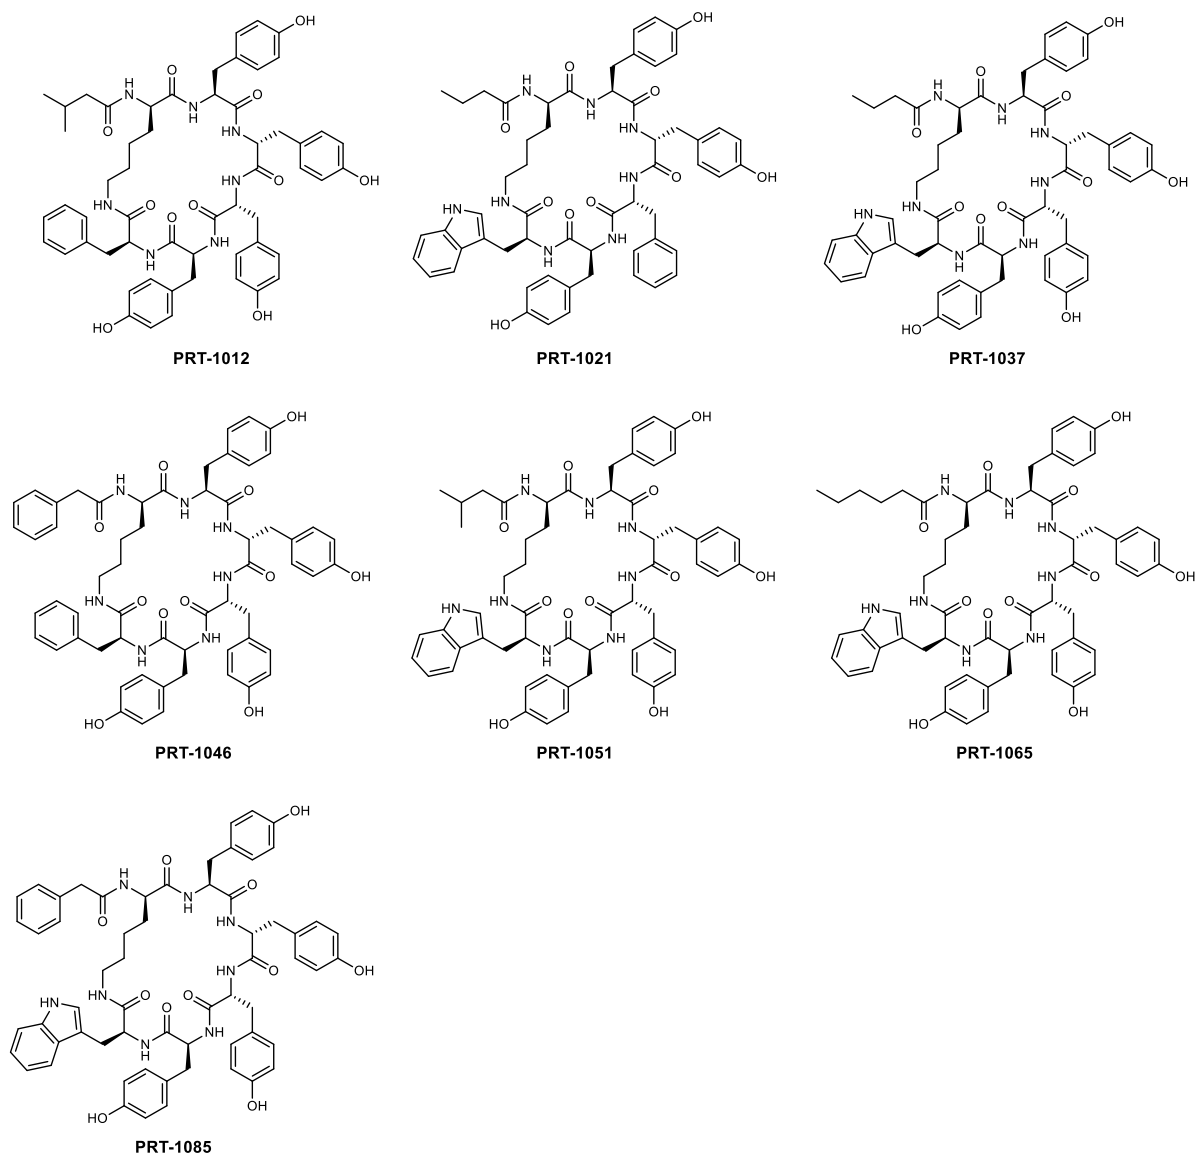

**Supplementary Figure 11.** Structures for PRT derivatives produced by *X. doucetiae* including amino acid configuration as concluded from the presence of epimerization domains in the corresponding NRPSs PrtAB.

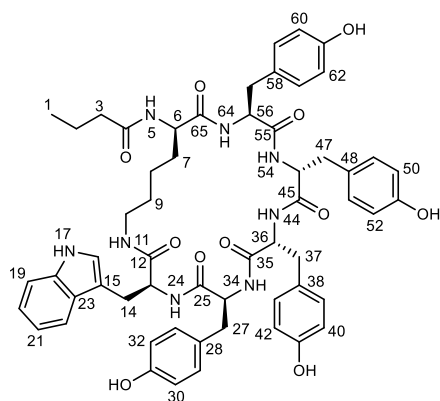

**Supplementary Figure 12.** Numbering of **PRT-1037** (NMR data are provided in Supplementary Table 2).

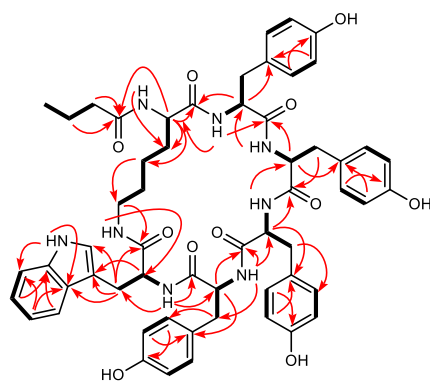

HMBC H → C  
 HSQC-COSY H — H

Supplementary Figure 13. Key HMBC and HSQC-COSY correlations PRT-1037.

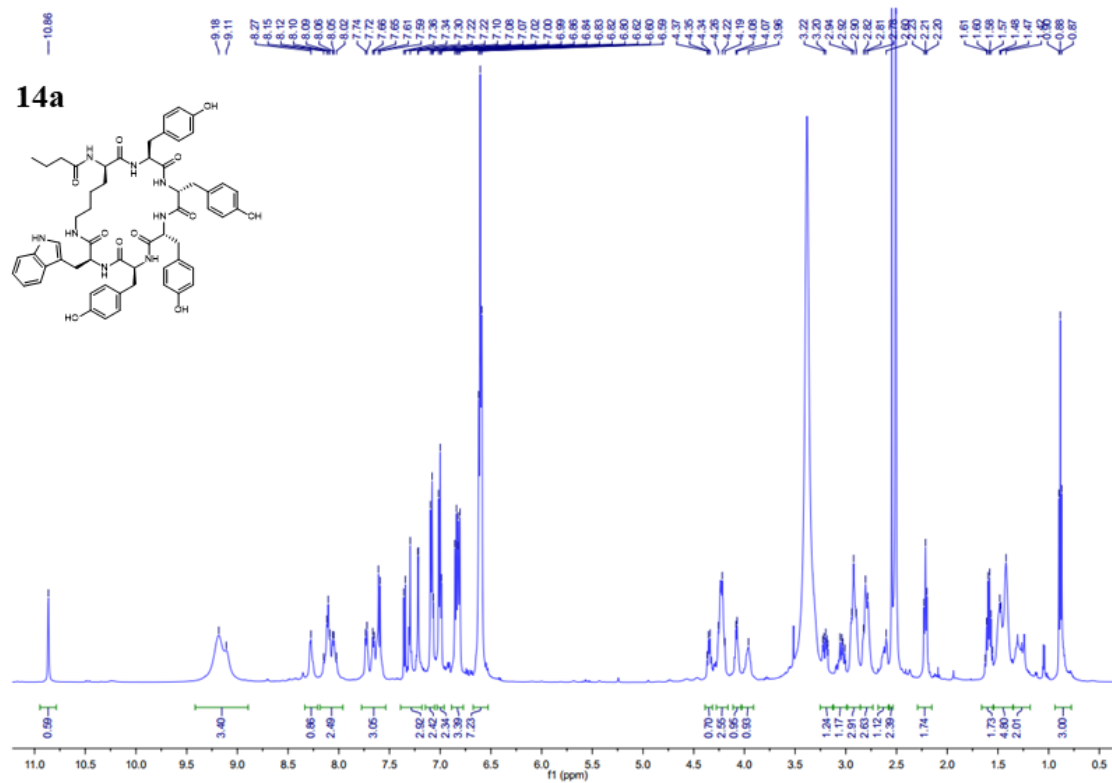

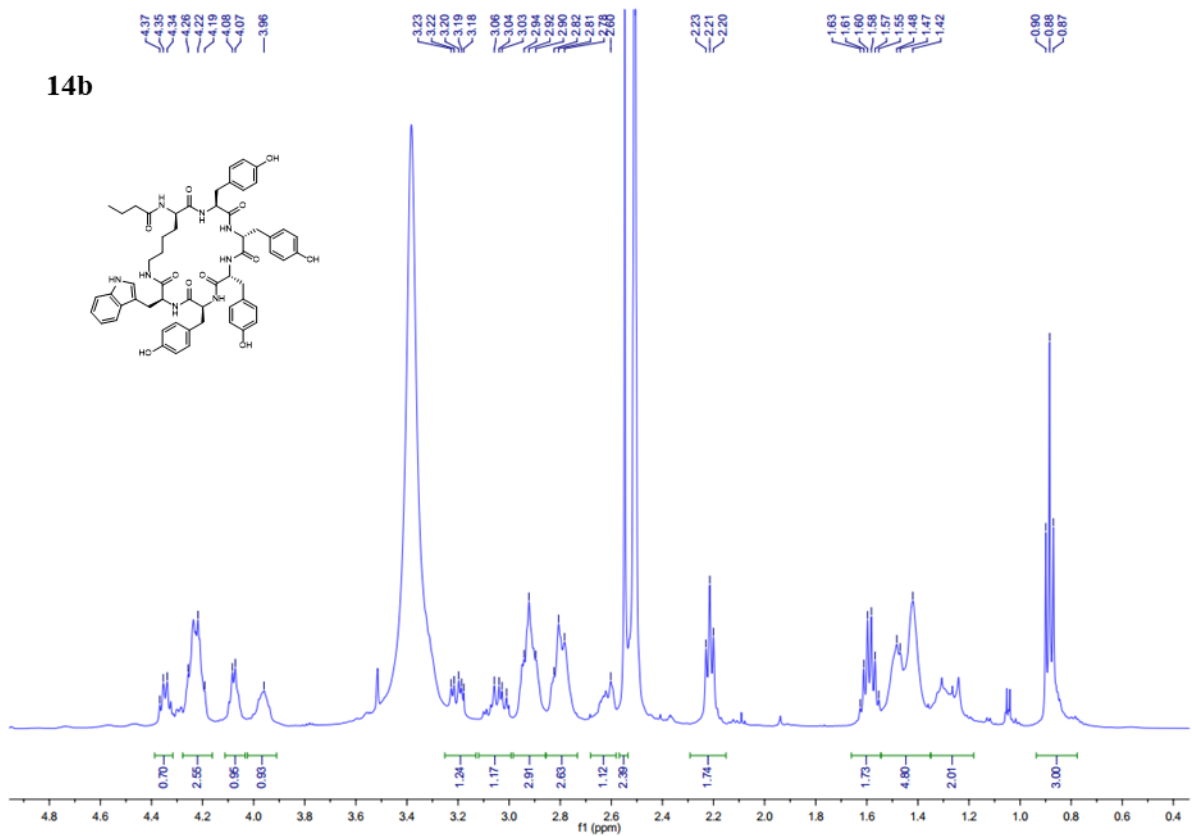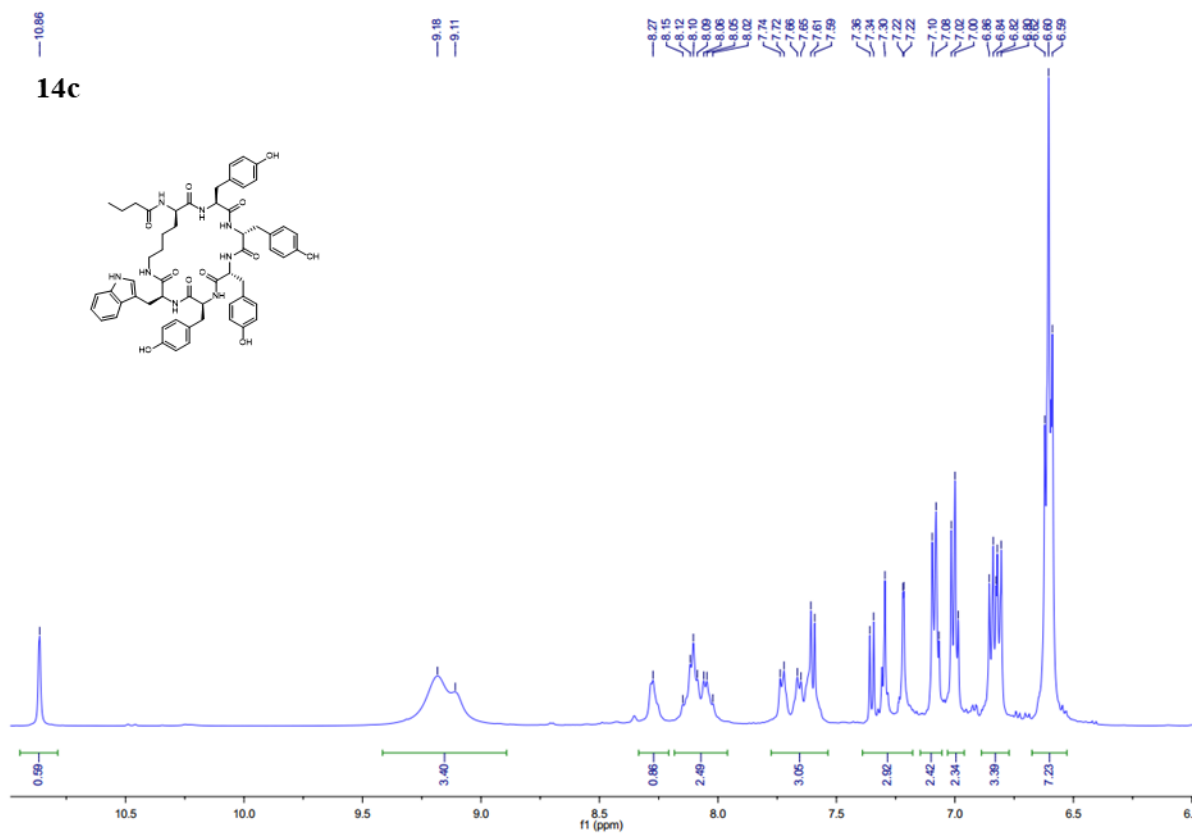

**Supplementary Figure 14 (a-c).** <sup>1</sup>H NMR (500 MHz) spectrum of compound **PRT-1037** in DMSO-*d*<sub>6</sub>.



15a

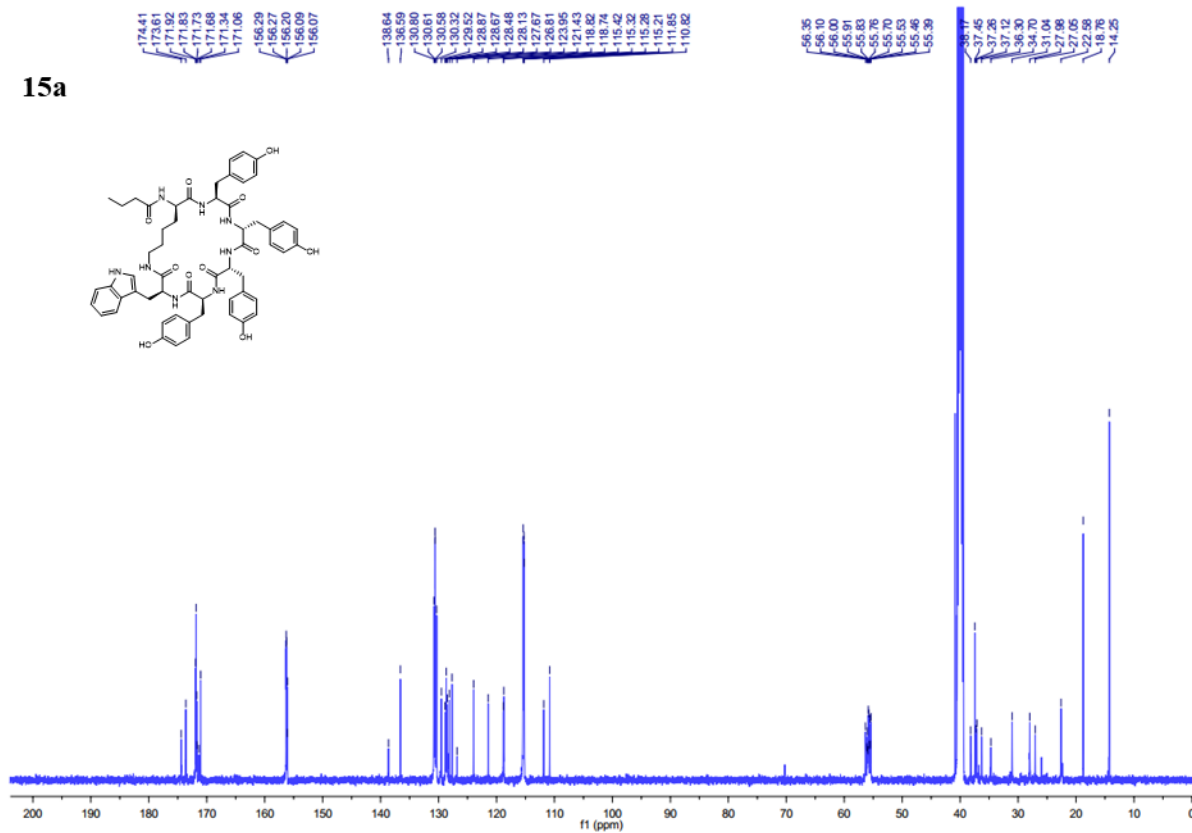

15b

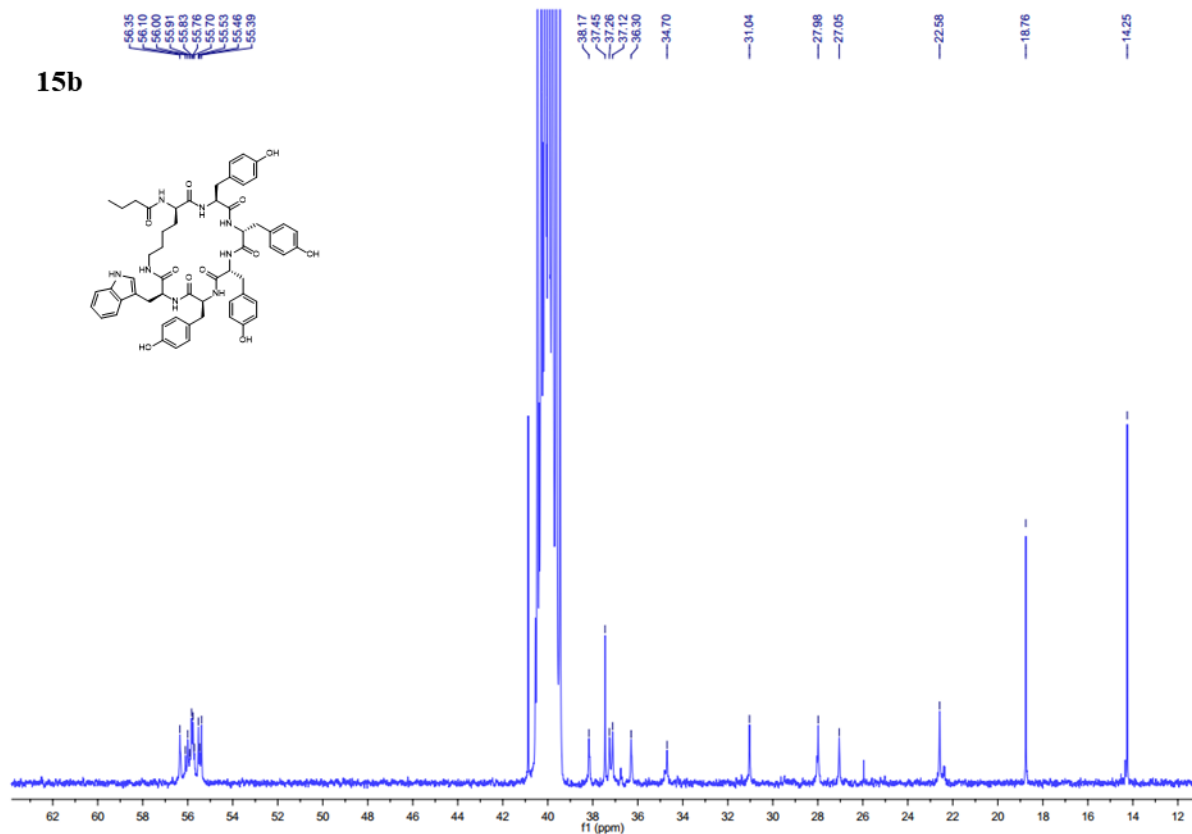

15c

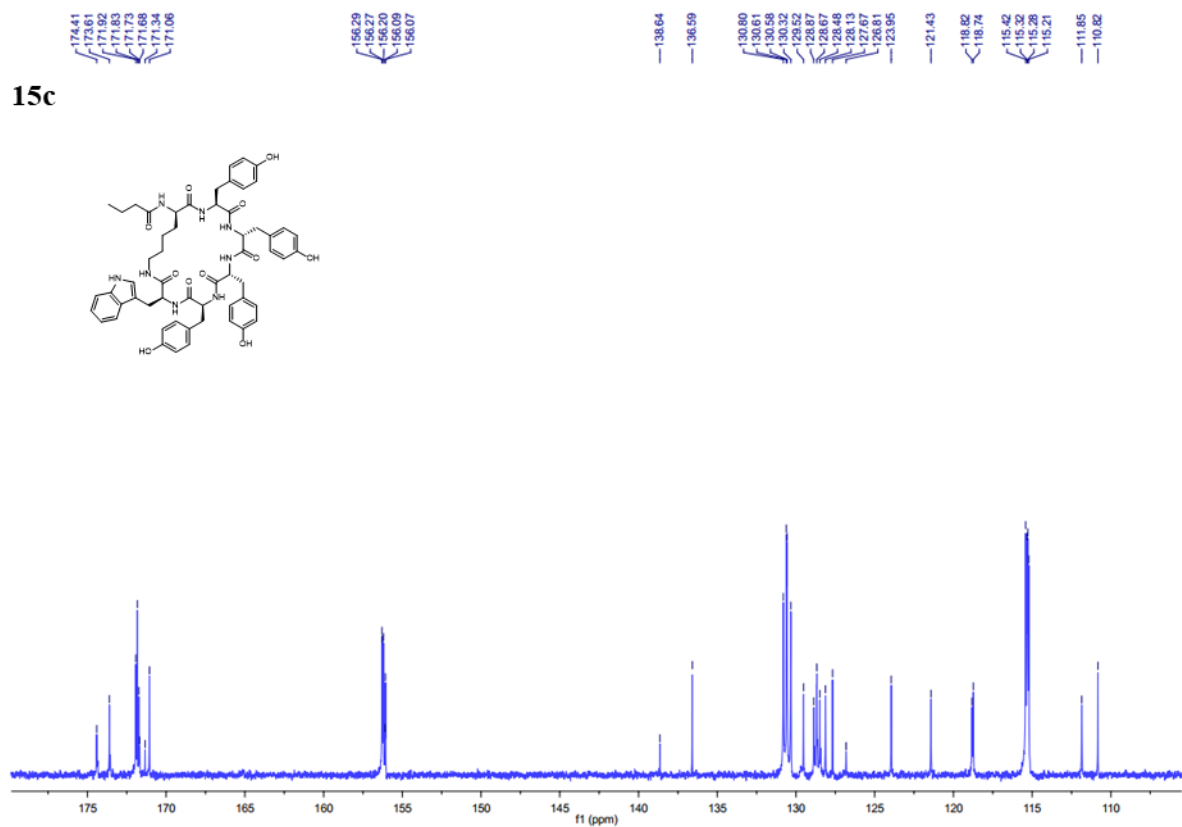

Supplementary Figure 15 (a-c). <sup>13</sup>C NMR (125 MHz) spectrum of compound PRT-1037 in DMSO-*d*<sub>6</sub>.

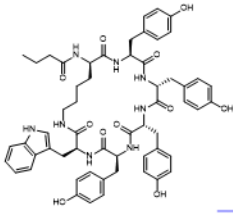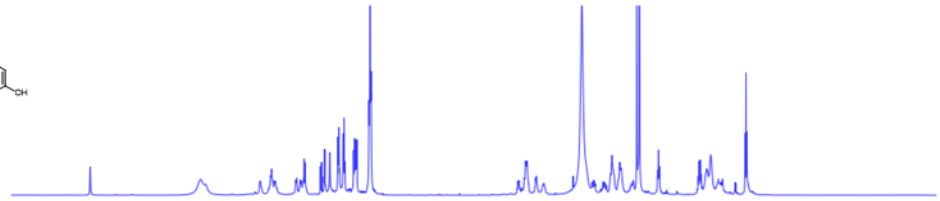

**16a**

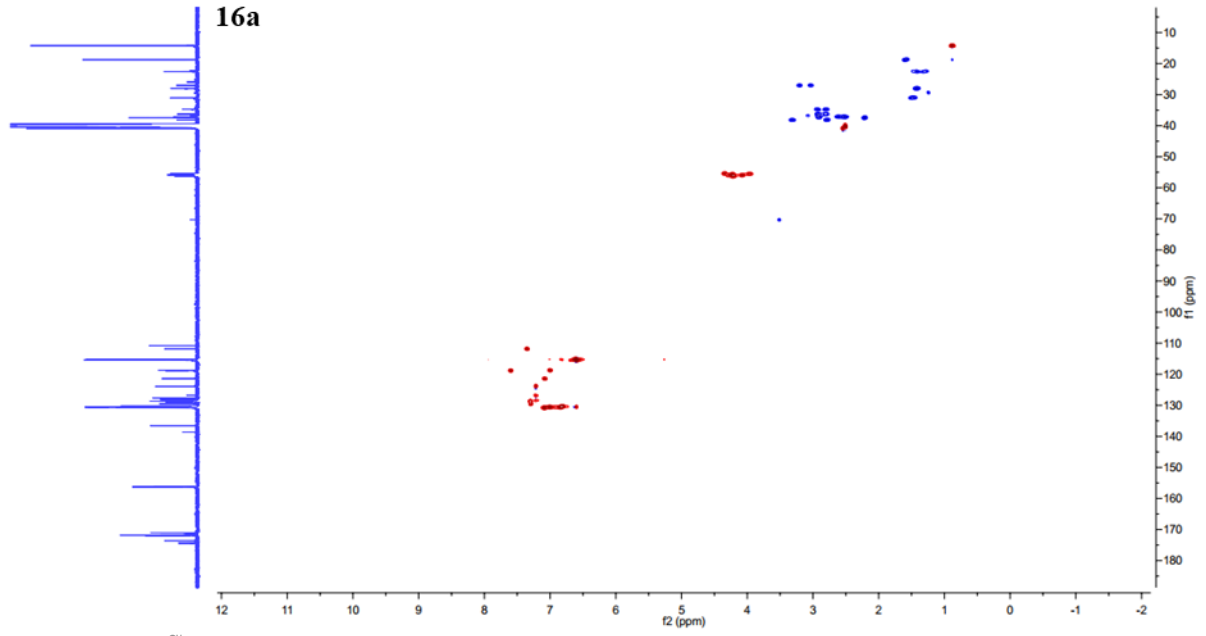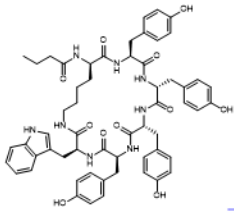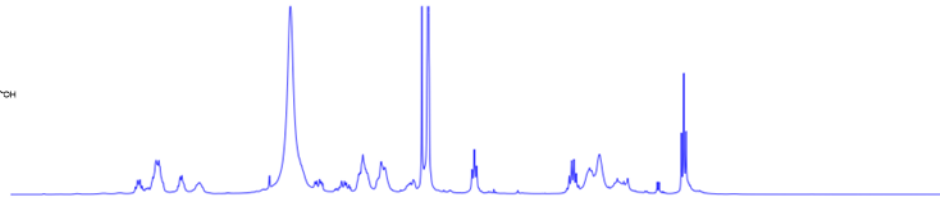

**16b**

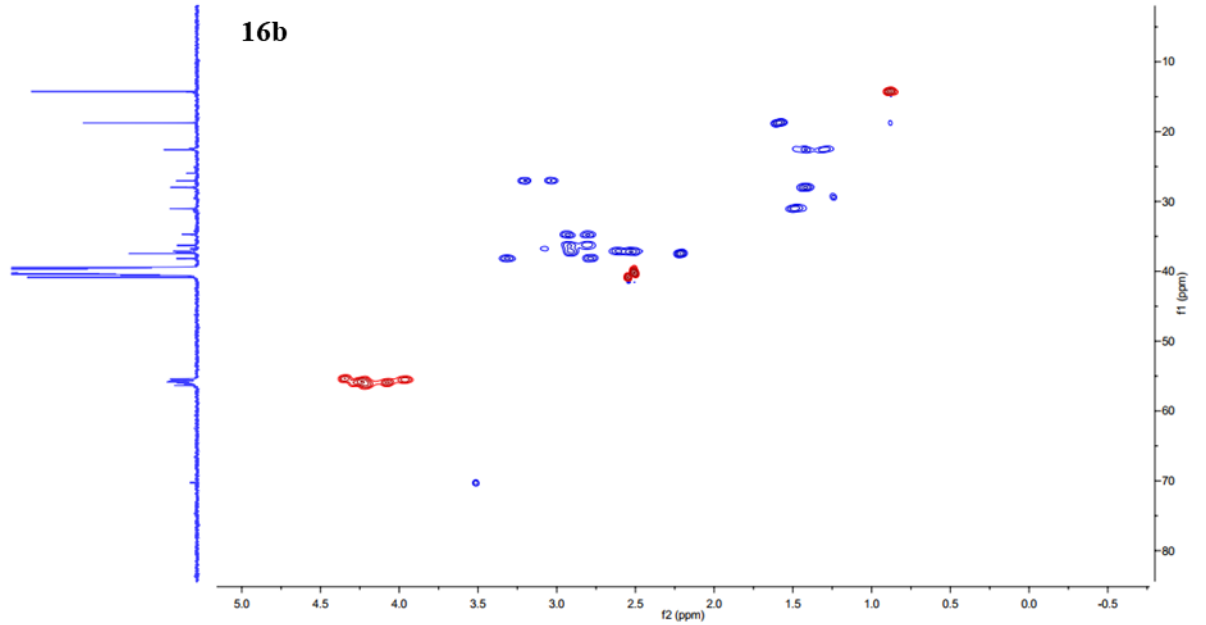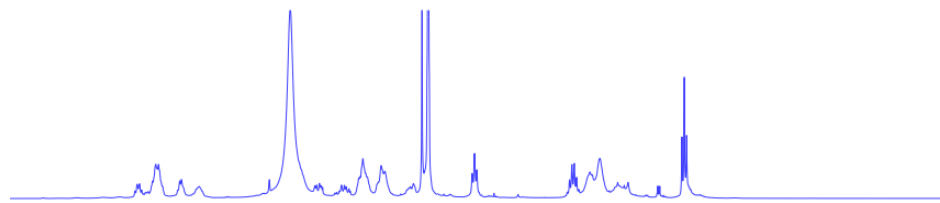

**16b**

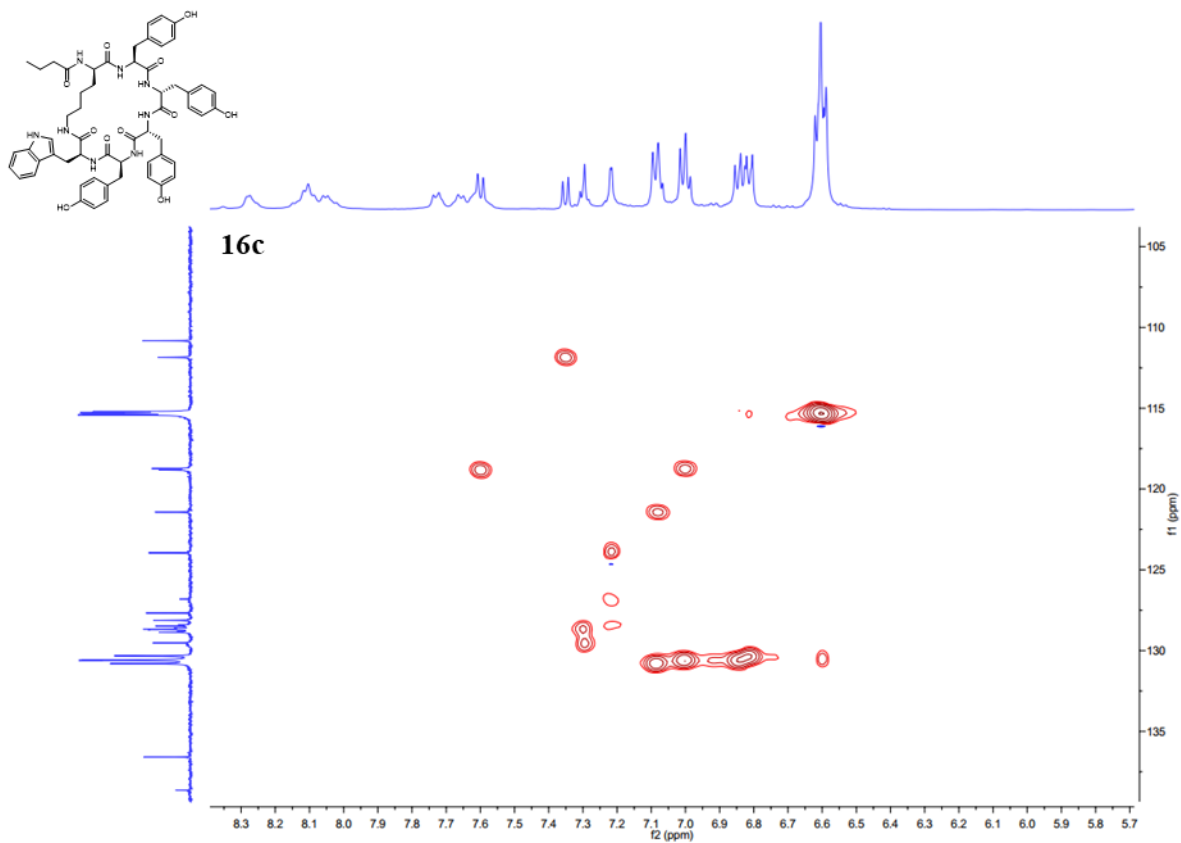

**Supplementary Figure 16 (a-c).** HSQC (500 MHz) spectrum of compound **PRT-1037** in DMSO-*d*<sub>6</sub>.

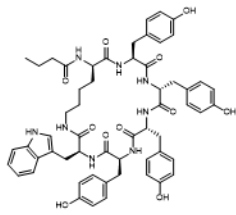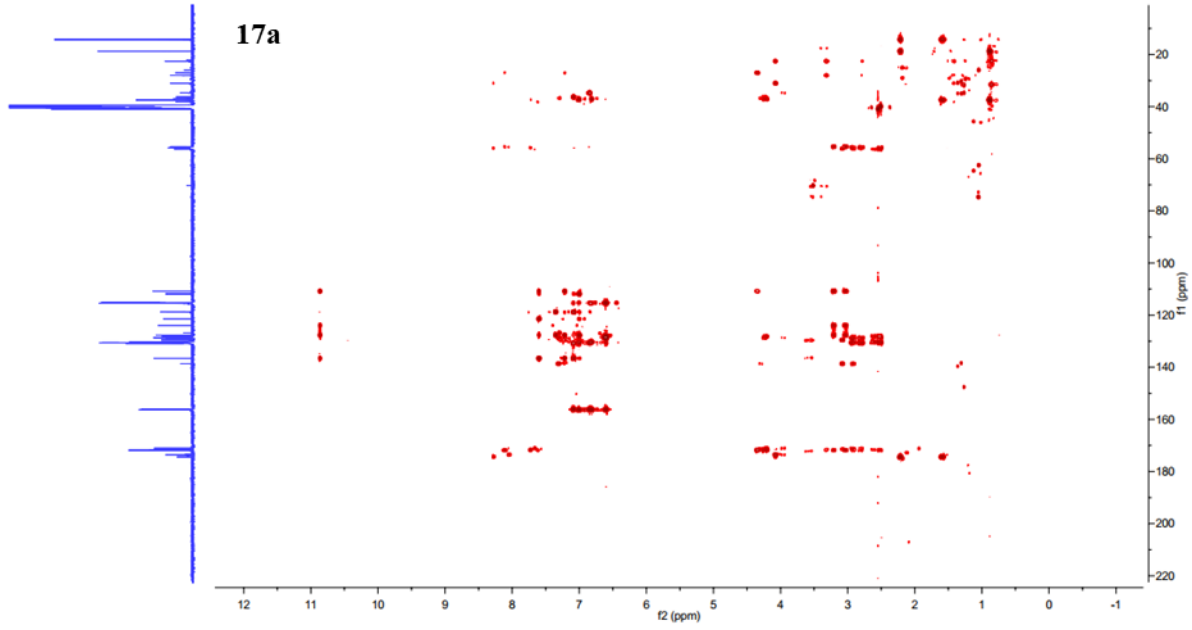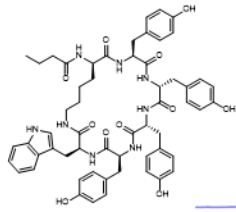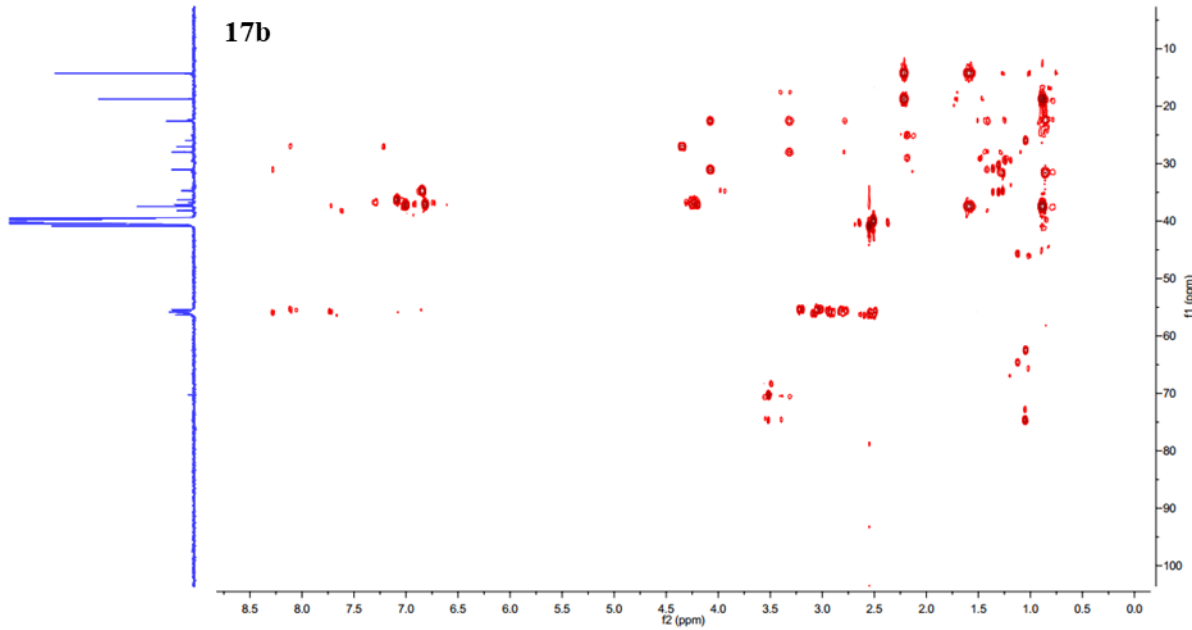

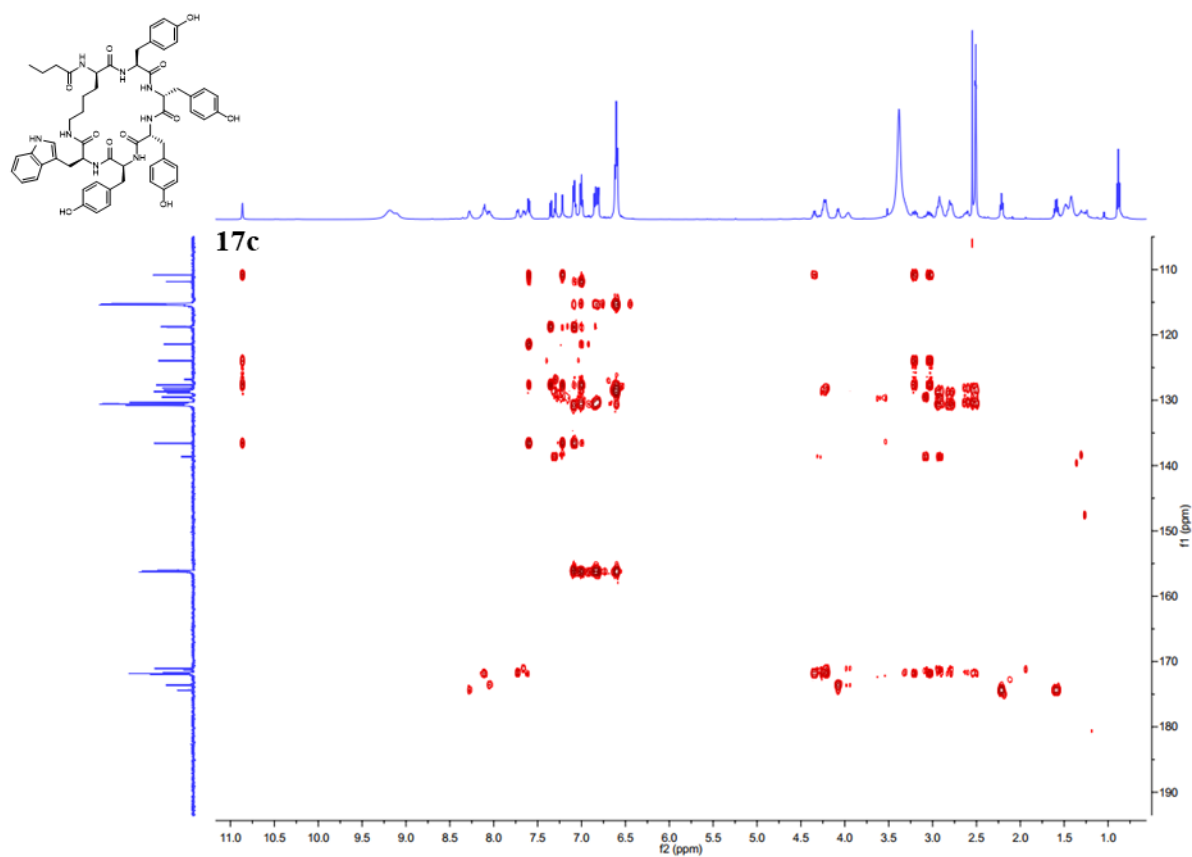

**Supplementary Figure 17 (a-c).** HMBC (500 MHz) spectrum of compound **PRT-1037** in DMSO- $d_6$ .

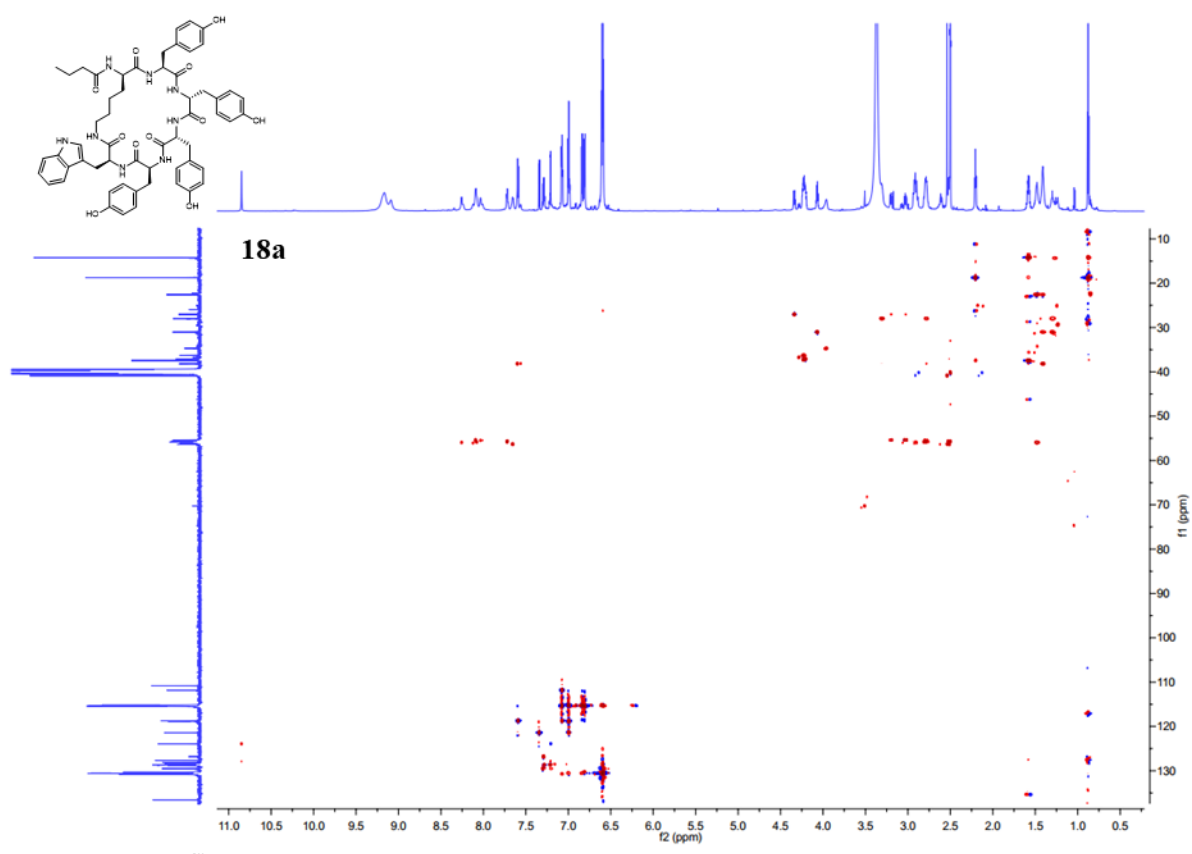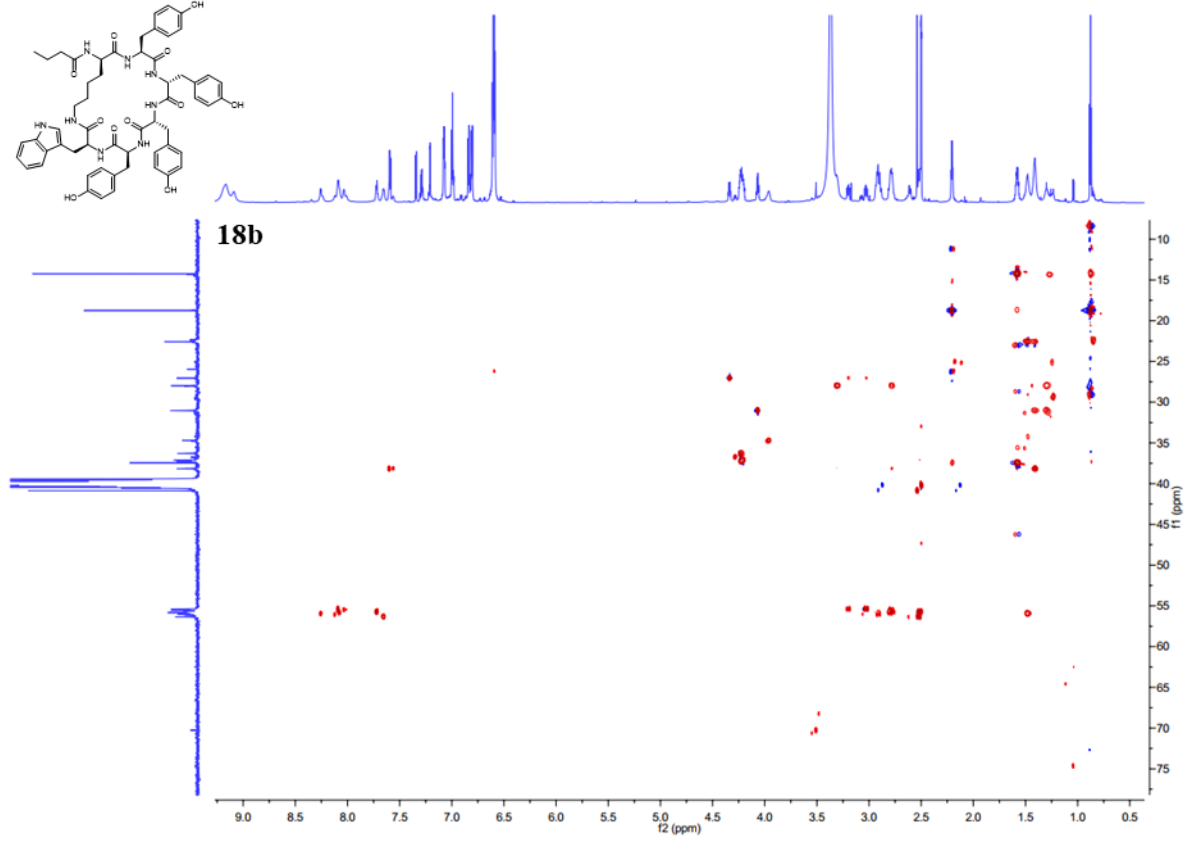

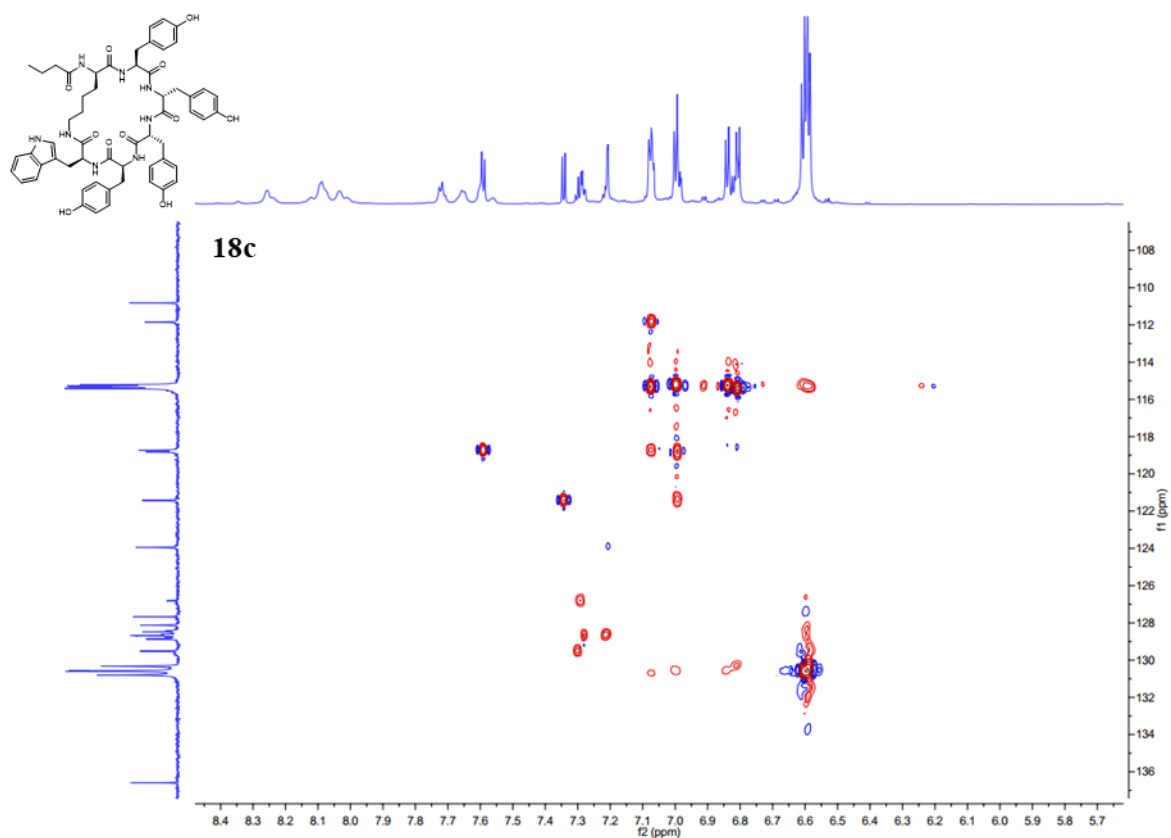

**Supplementary Figure 18 (a-c).** HSQC-COSY (900 MHz) spectrum of compound **PRT-1037** in DMSO-*d*<sub>6</sub>.



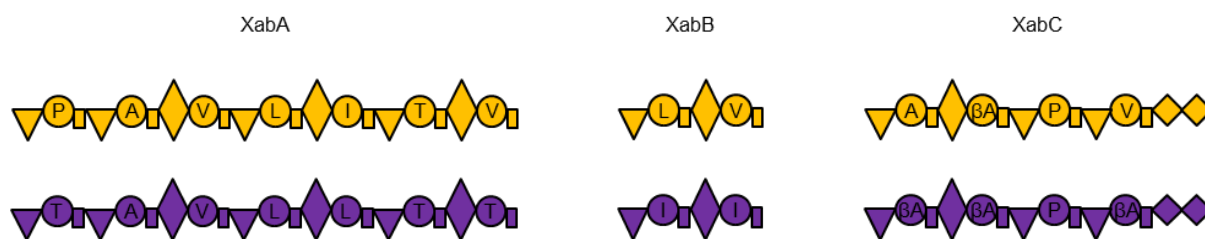

**Supplementary Figure 19.** General NRPS structure of xenoamicin XabABC in *X. doucetiae* (yellow) and *Xenorhabdus KJ12.1* (violet). Amino acid specificities are displayed for all A-domains. For domain assignment the following symbols are used: A (large circles), T (rectangle), C (triangle), C/E (diamond), TE-TE (two C-terminal small diamonds).

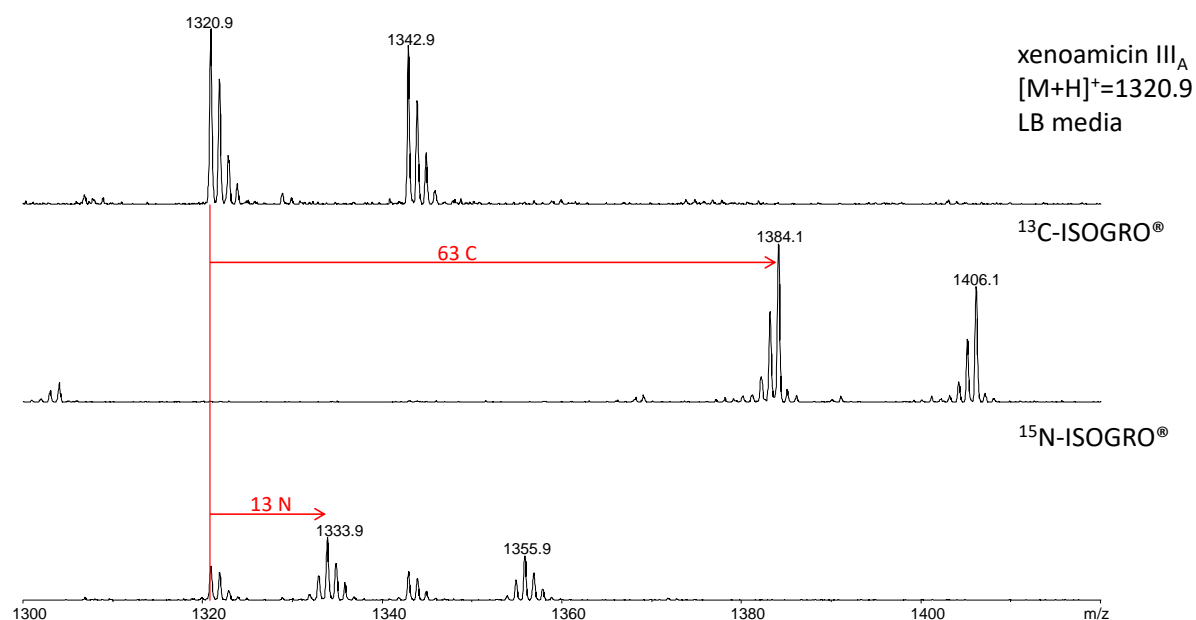

**Supplementary Figure 20.** Determination of the number of carbon and nitrogen atoms in XAM-1320 by cultivation of *Xenorhabdus KJ12.1* in LB medium, <sup>13</sup>C labelled or <sup>15</sup>N labelled ISOGRO® medium and the following mass shift detected by mass spectrometry.

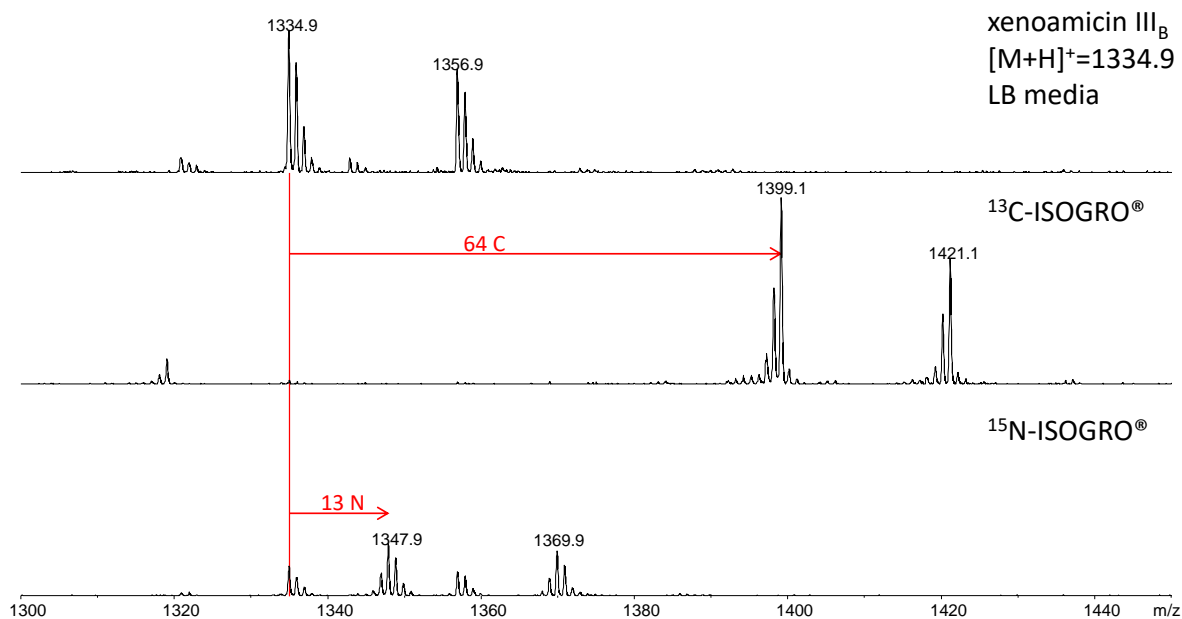

**Supplementary Figure 21.** Determination of the number of carbon and nitrogen atoms in **XAM-1334** by cultivation of *Xenorhabdus* KJ12.1 in LB medium, <sup>13</sup>C labelled or <sup>15</sup>N labelled ISOGRO® medium and the following mass shift detected by mass spectrometry.

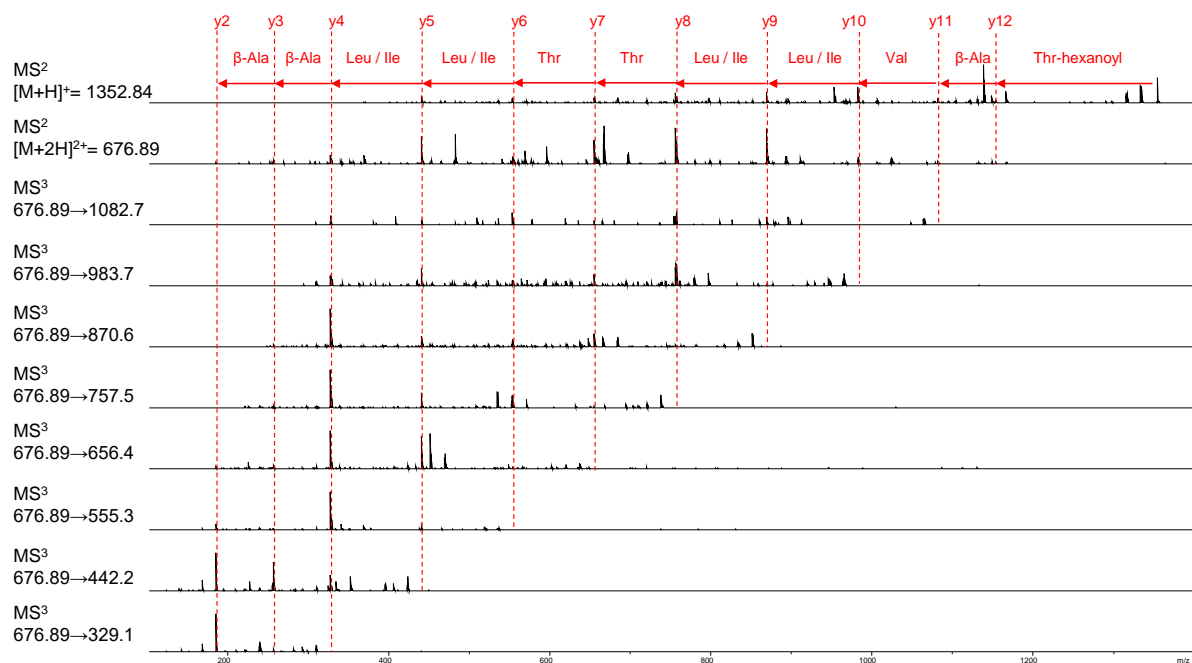

**Supplementary Figure 22.** MS<sup>2</sup> and MS<sup>3</sup> spectra of linearized **XAM-1334**. The complete serial of y-ions could be assigned in MS<sup>3</sup> spectra from the double charged xenoamicin ion (m/z = 676.9 [M+2H]<sup>2+</sup>).

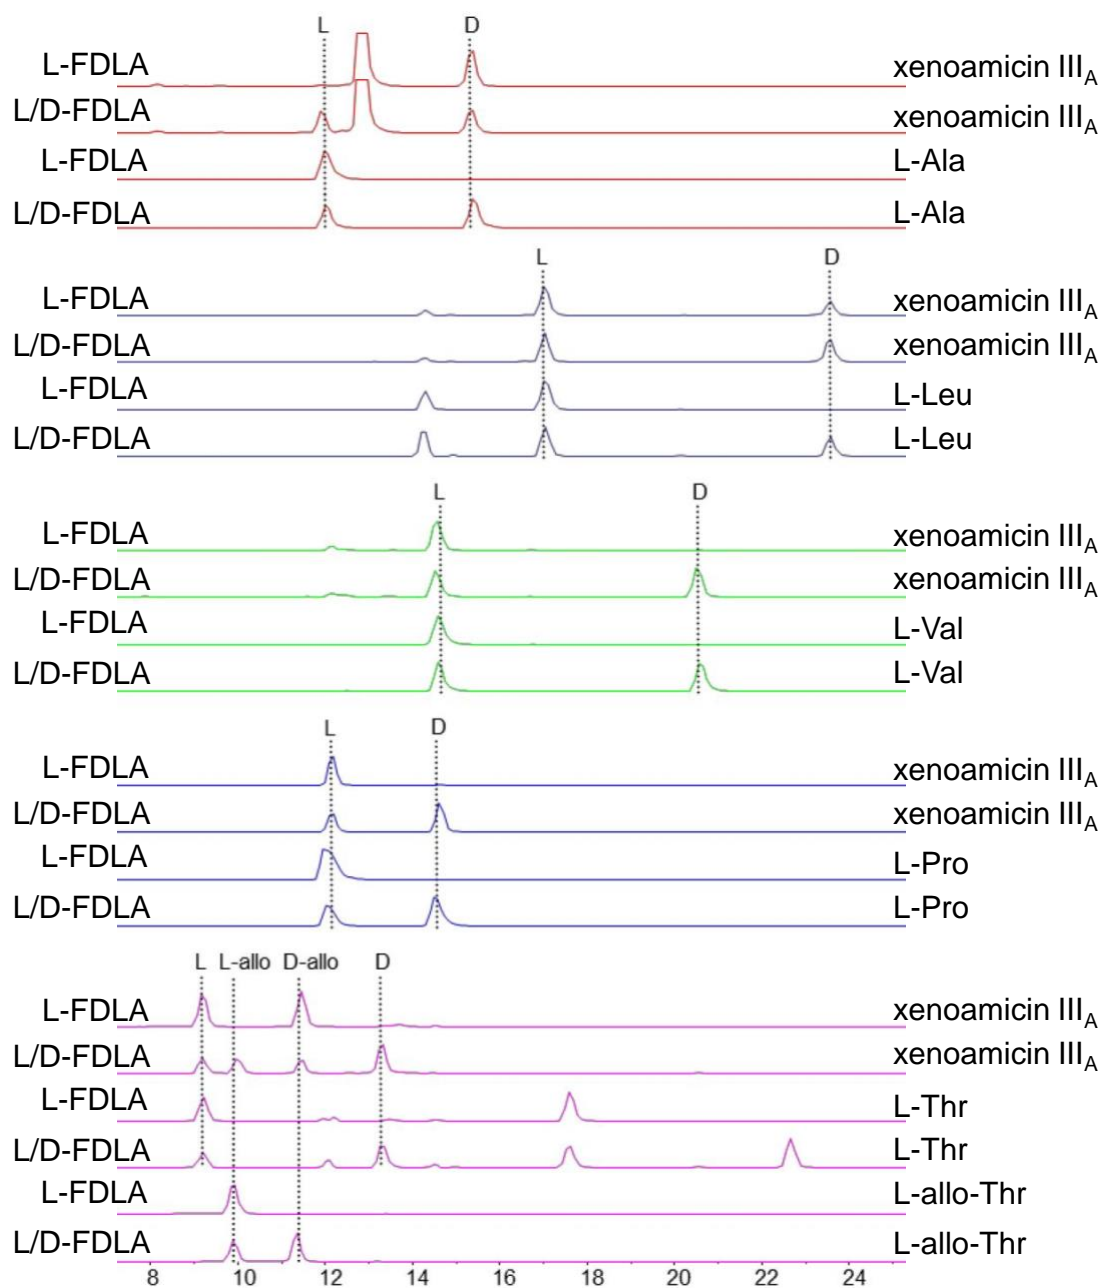

**Supplementary Figure 23. Determination of the absolute configuration of amino acids in XAM-1320 by the advanced Marfey's method.** The single amino acids were measured in the positive mode. The following  $m/z$  ratios ( $[M+H]^+$ ) were used to detect the amino acids: alanine 384, leucine 426, valine 412, proline 410, threonine 414. For every amino acid the references are also shown.

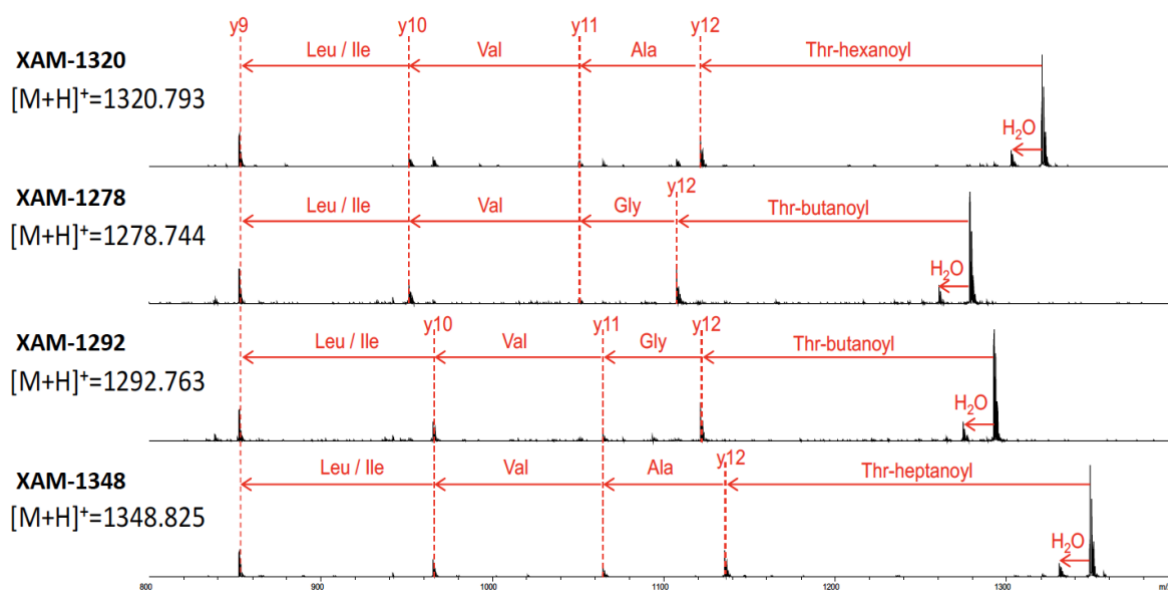

**Supplementary Figure 24. MS<sup>2</sup> spectra of derivatives according to Xenoamicin-like Family.**

Compounds **14** ( $m/z = 1278.744 [M+H]^+$ ), **15** ( $m/z = 1292.763 [M+H]^+$ ) and **16** ( $m/z = 1348.825 [M+H]^+$ ) differ to multiple of 14 Da from compound **12**. Mass differences could be localised between y12 and y10 ions.

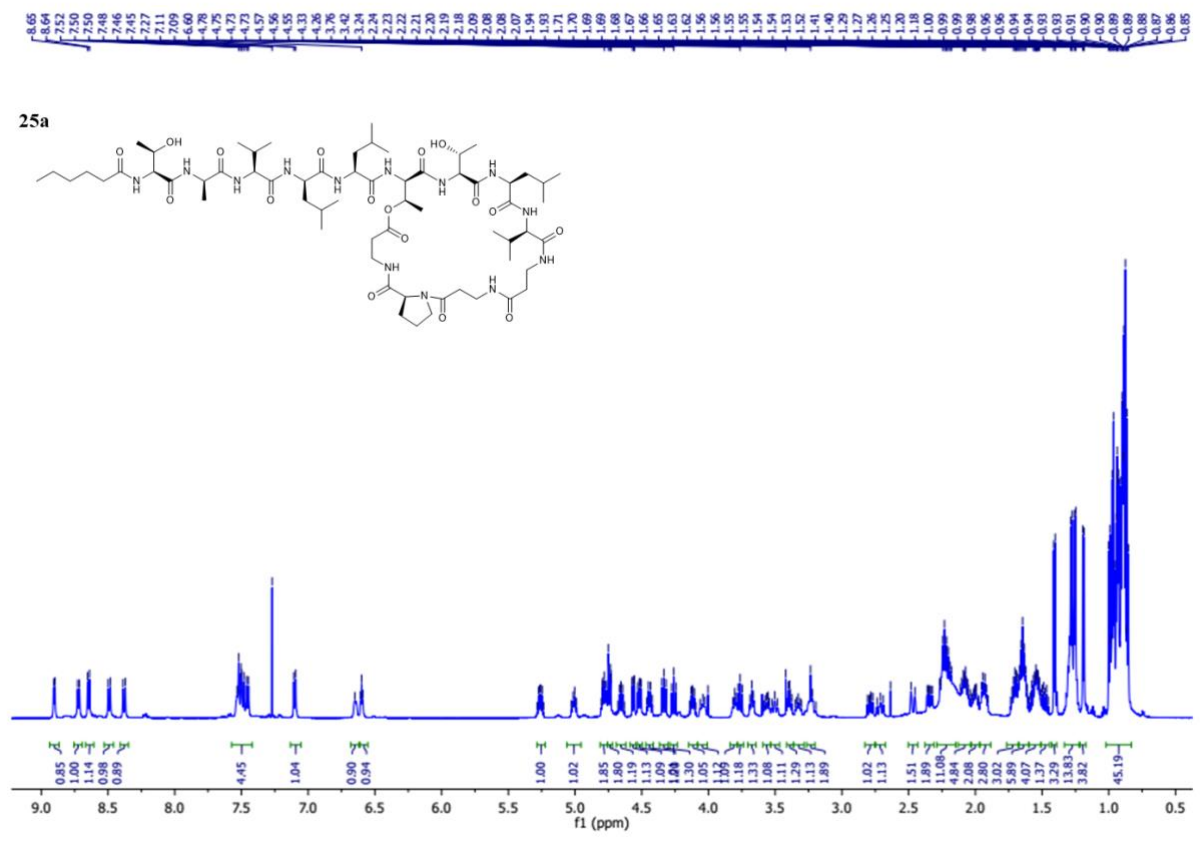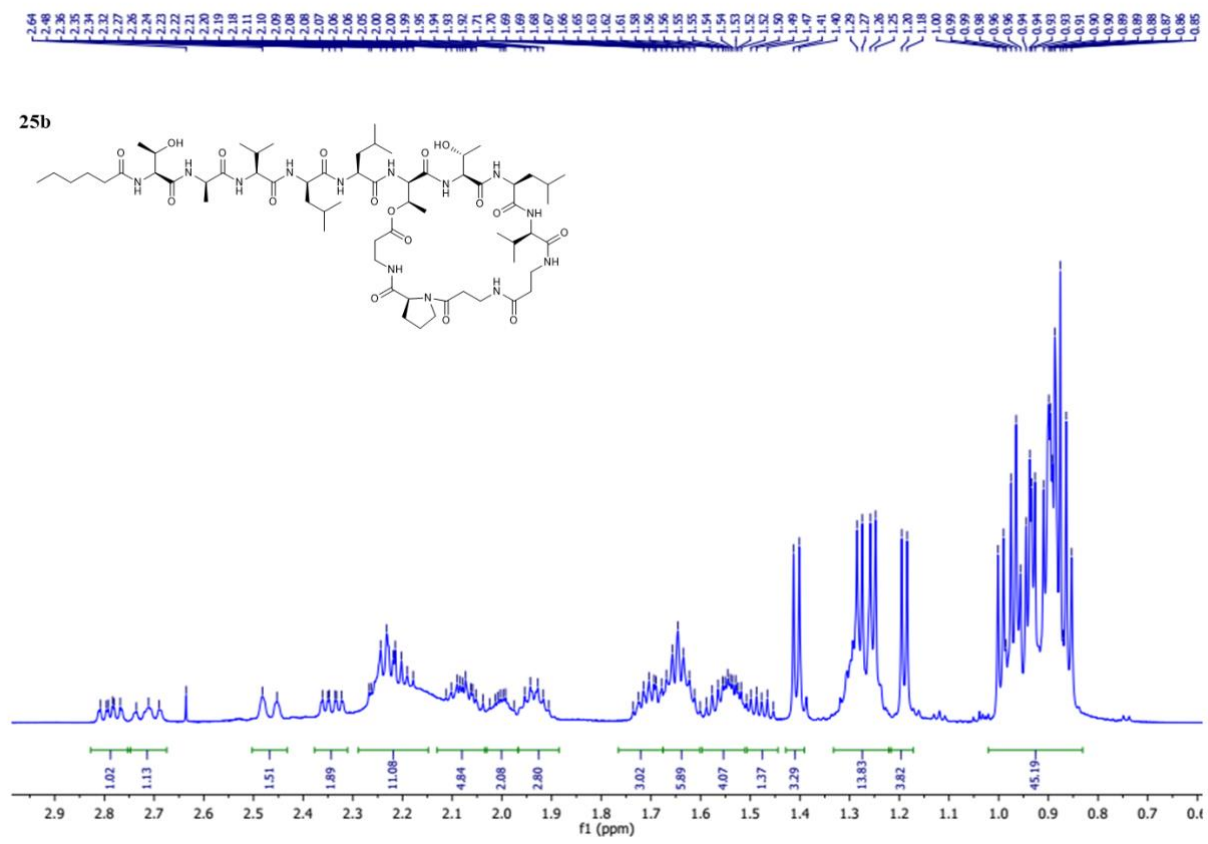

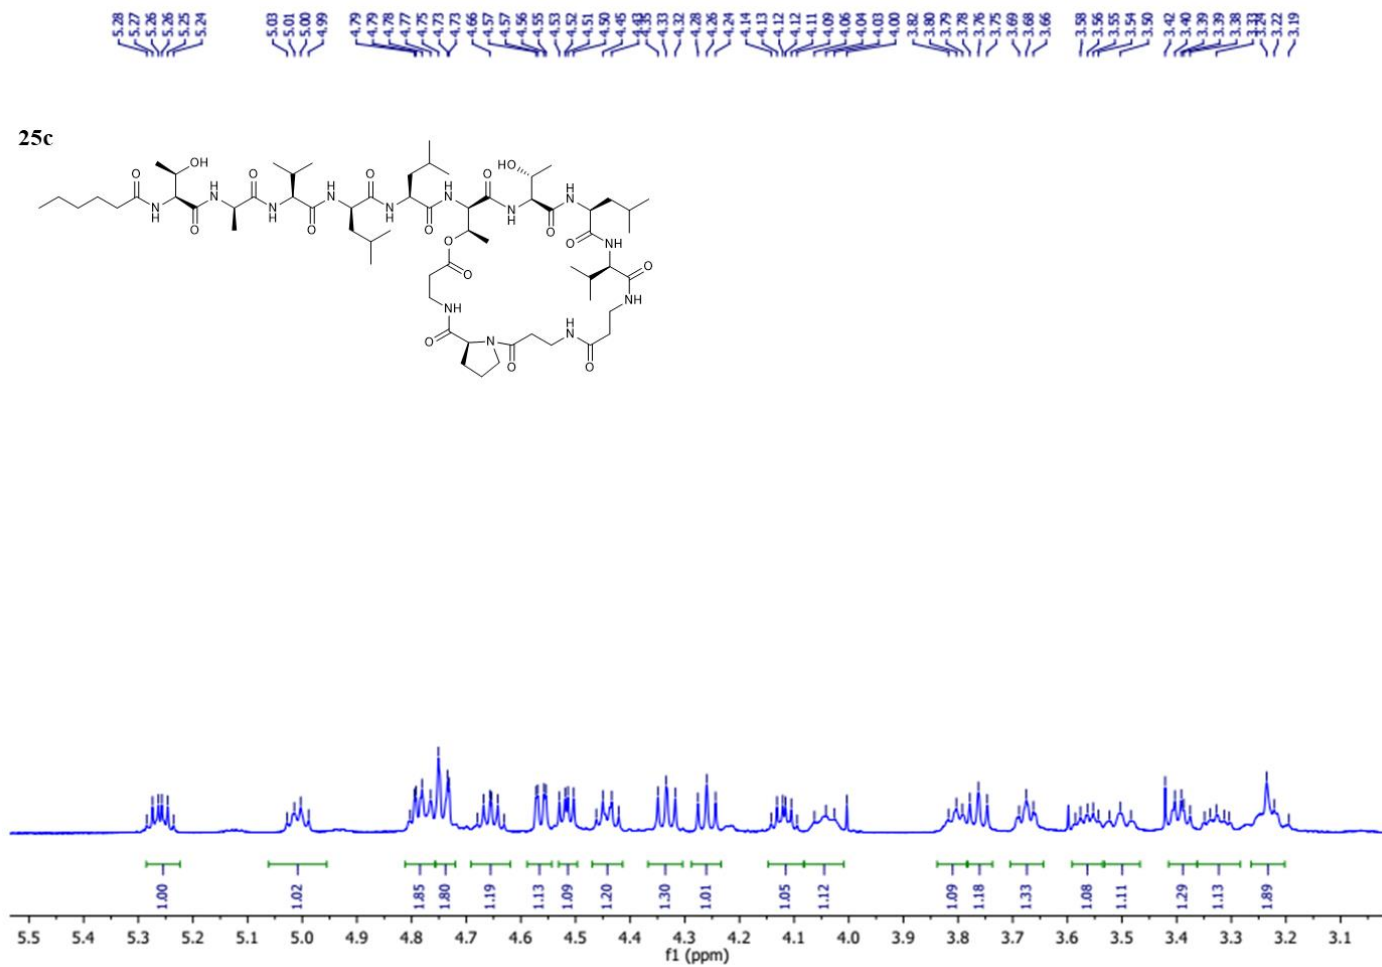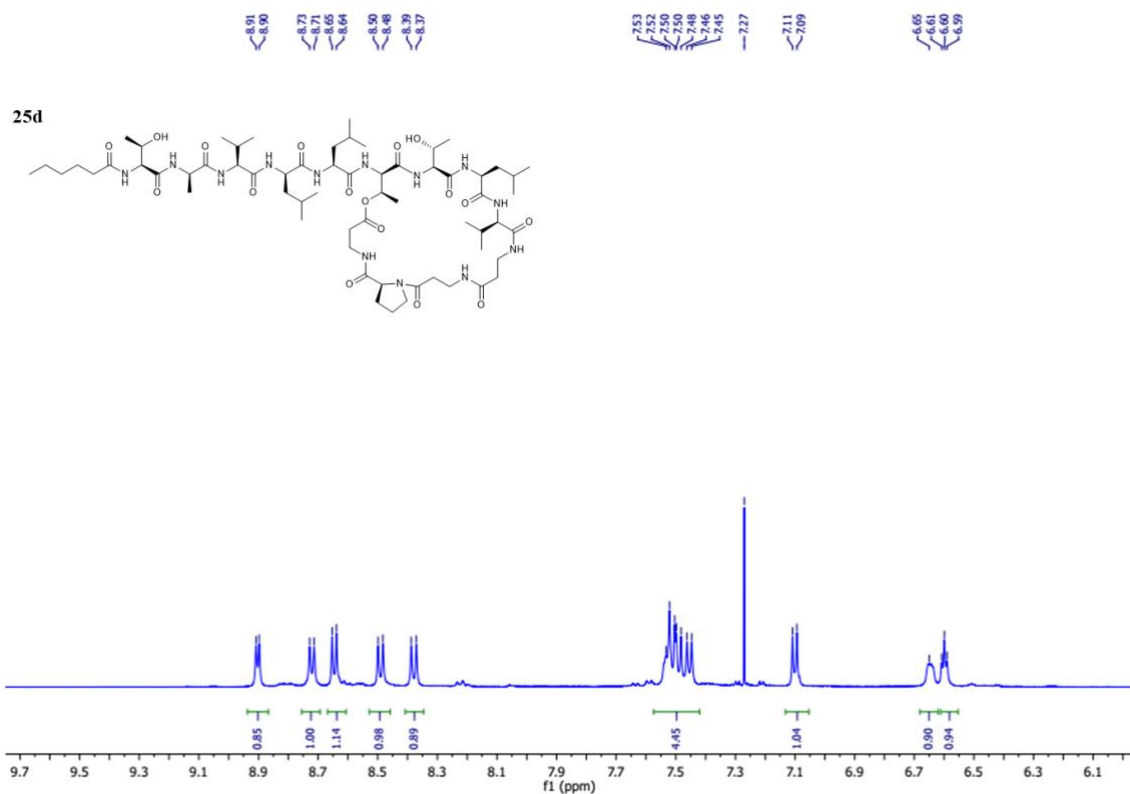

**Supplementary Figure 25 (a-d).**  $^1\text{H}$  NMR (600 MHz) spectrum of compound XAM-1320 in  $\text{CDCl}_3$ .

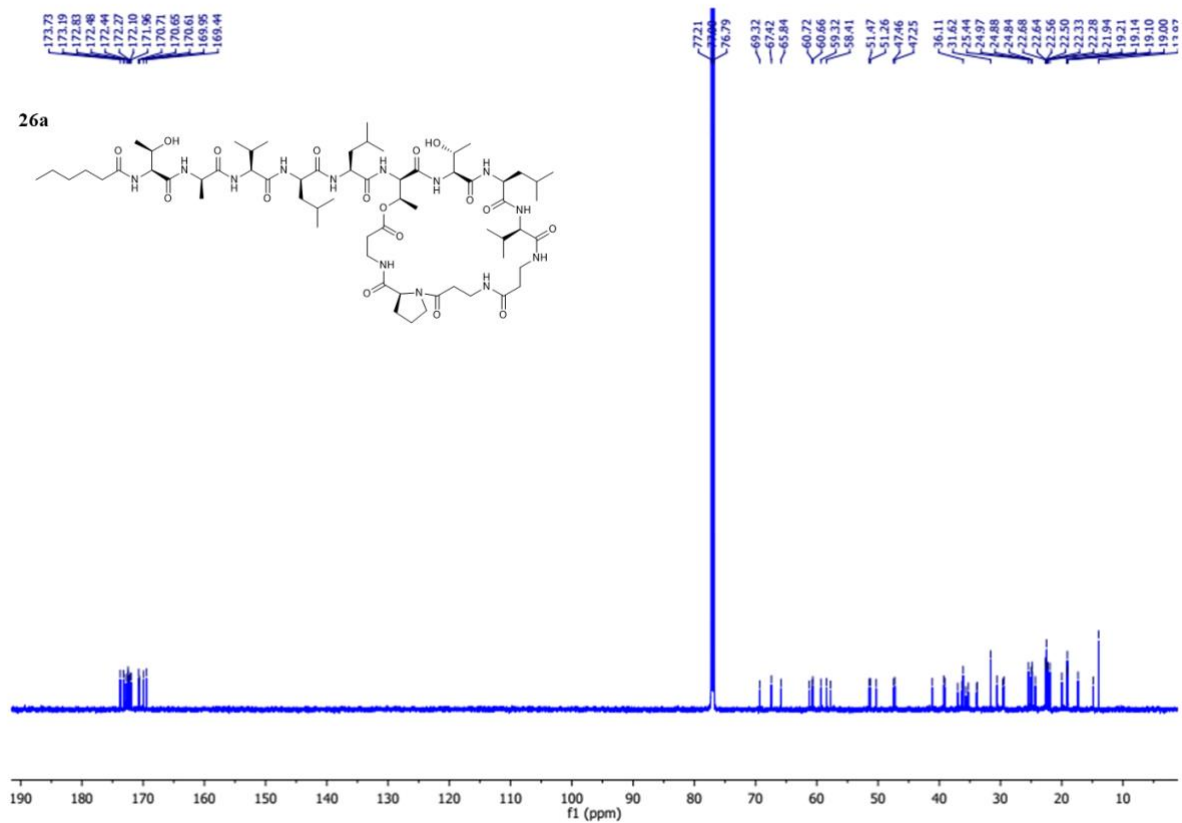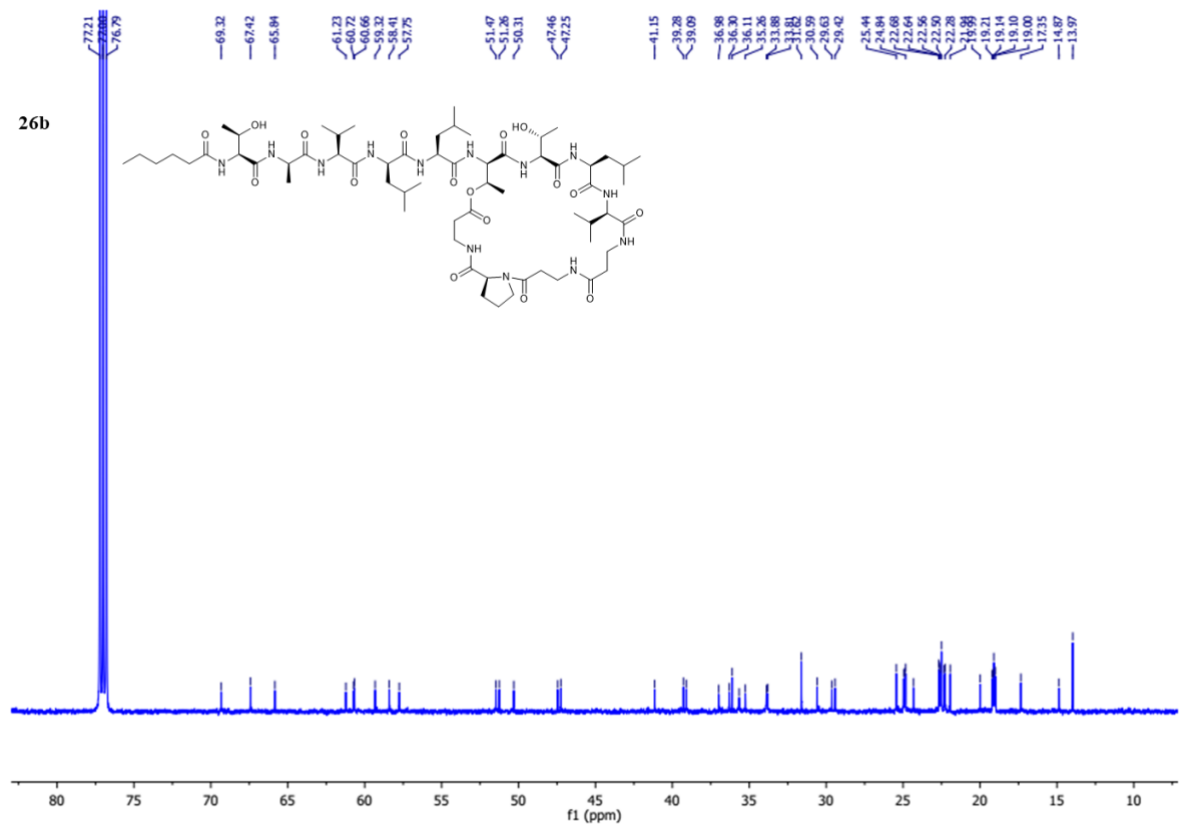

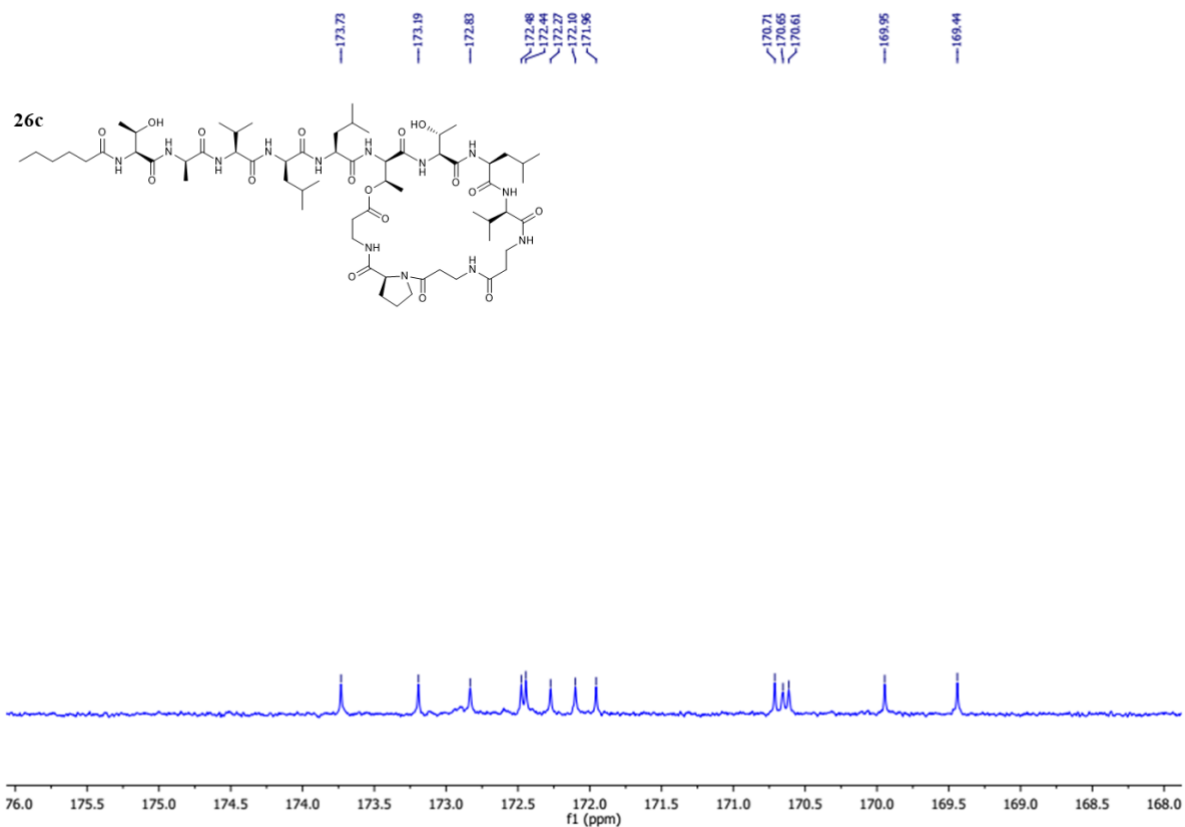

**Supplementary Figure 26 (a-c).** <sup>13</sup>C NMR (150 MHz) spectrum of compound **XAM-1320** in CDCl<sub>3</sub>.



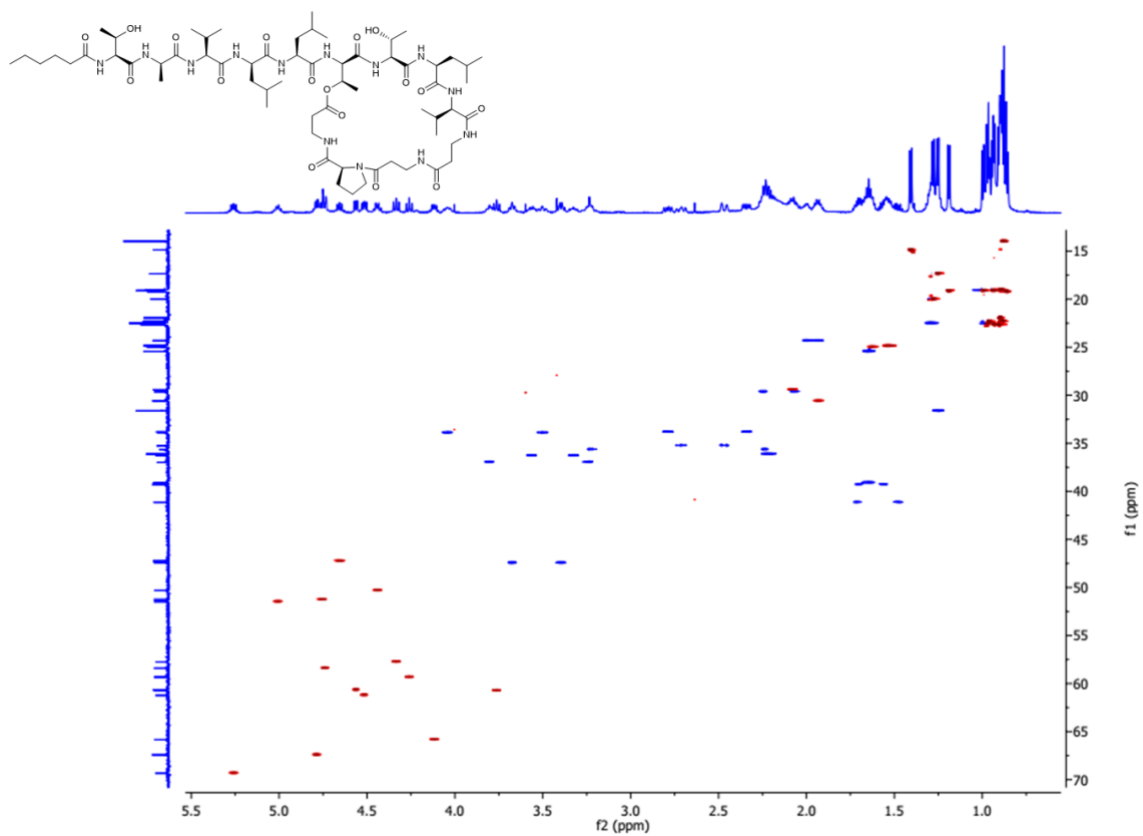

**Supplementary Figure 27.** HSQC (600 MHz) spectrum of compound **XAM-1320** in  $\text{CDCl}_3$ .

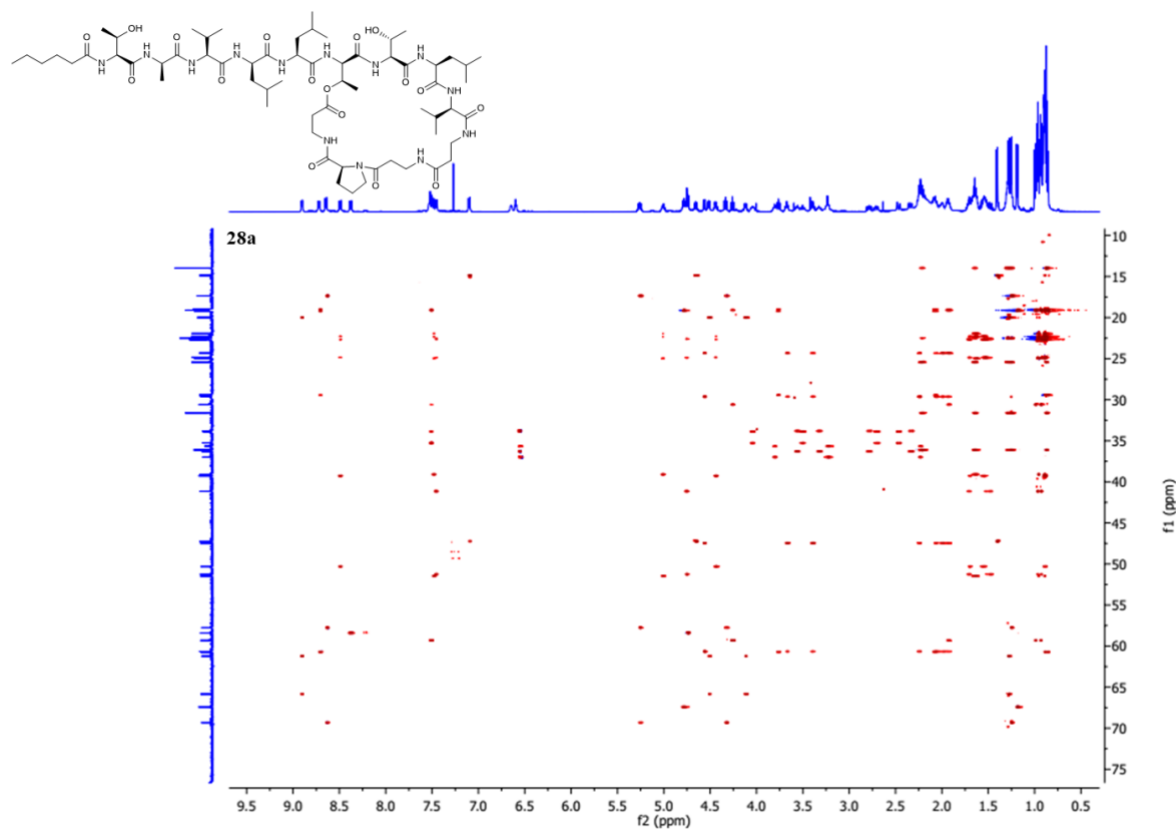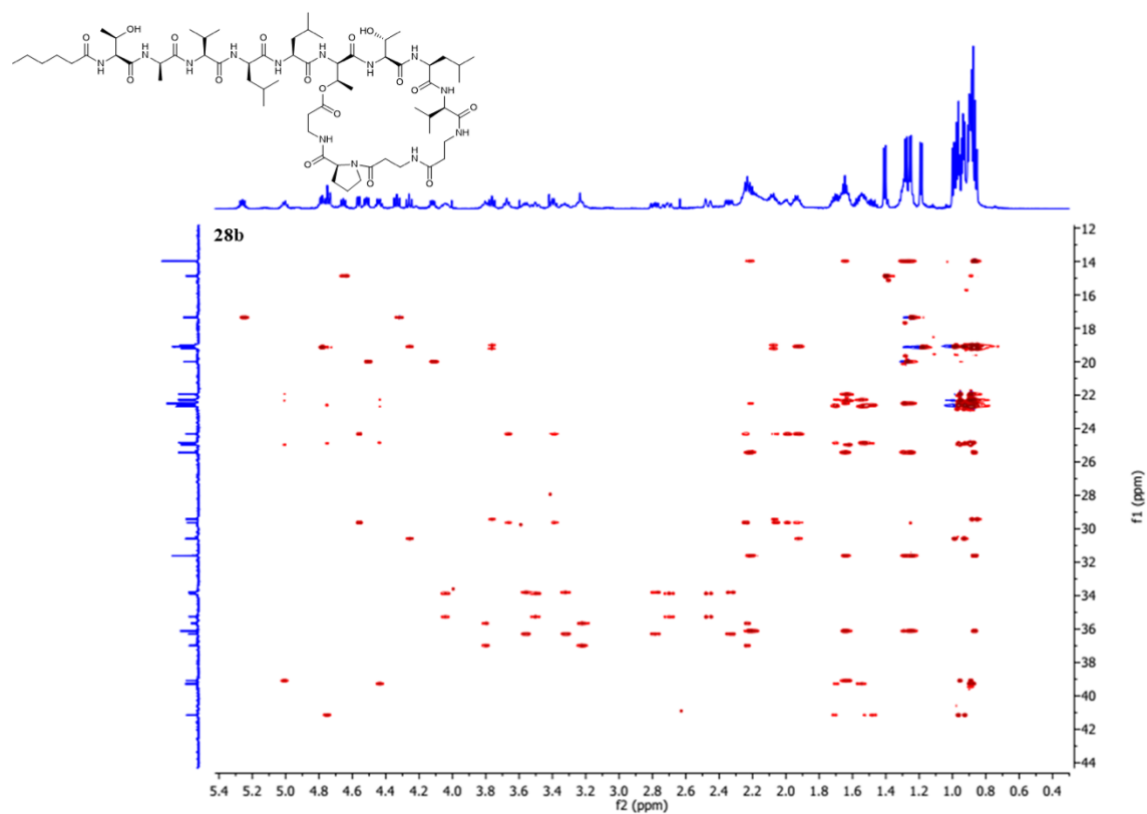

**Supplementary Figure 28 (a-b).** HSQC-TOCSY (600 MHz) spectrum of compound **XAM-1320** in  $\text{CDCl}_3$ .

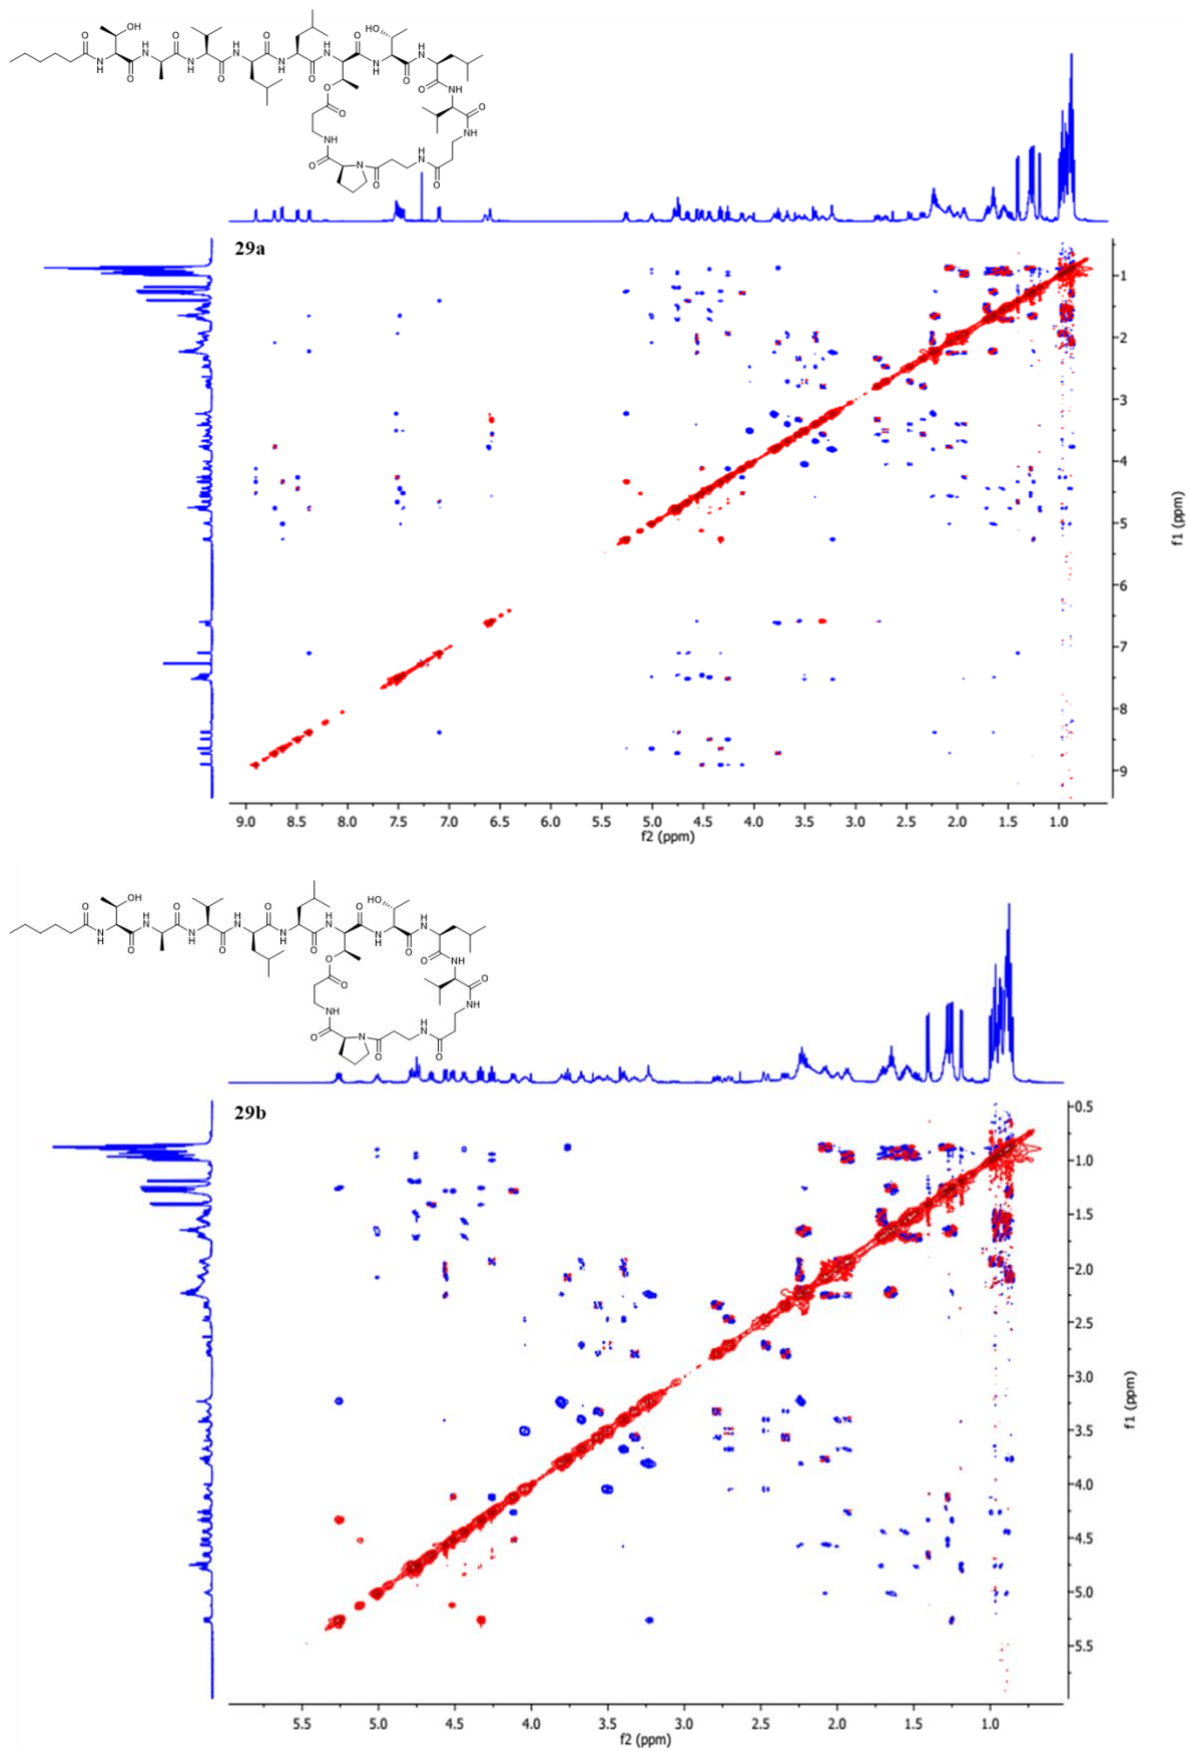

Supplementary Figure 29 (a-b). ROESY (600 MHz) spectrum of compound XAM-1320 in CDCl<sub>3</sub>.

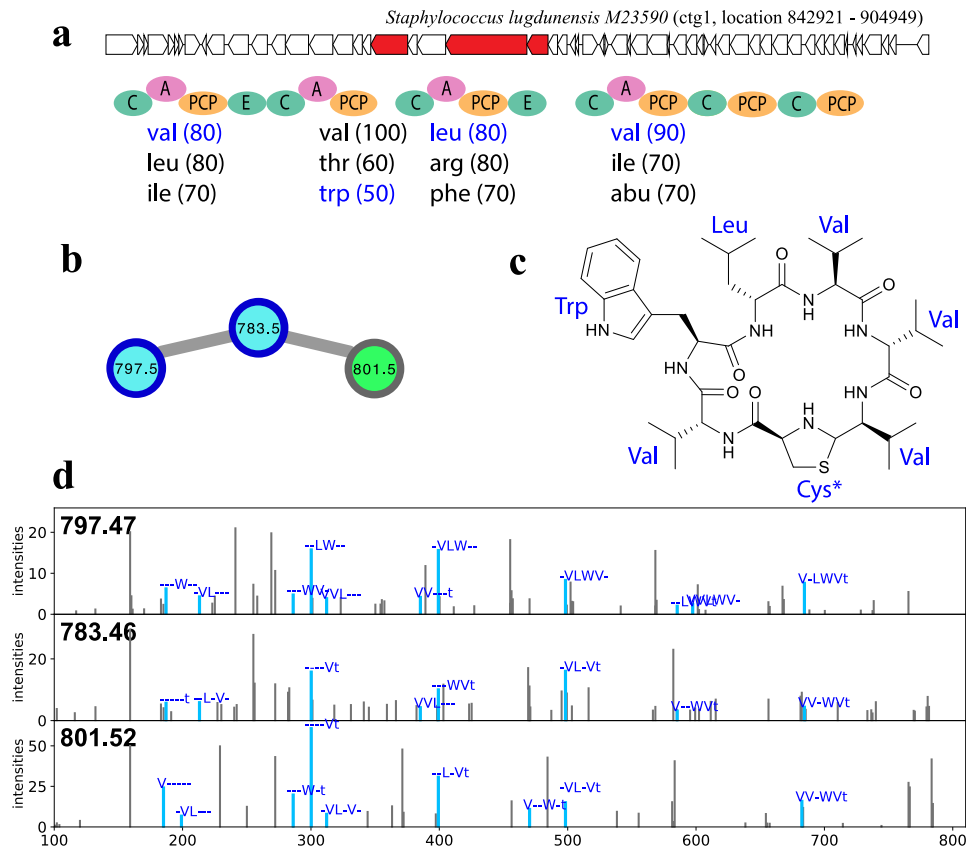

**Supplementary Figure 30. Lugdunin NRP family matched by NRPminer in the SkinStaph dataset.** (a) The BGC generating the core NRP in *S. lugdunensis* along with NRPS genes (shown in red) and the A-, C-, PCP-, and E-domains appearing in the corresponding NRPS. The rest of the genes in the corresponding contigs are shown in white. Three highest-scoring amino acids for each A-domain in this BGC (according to NRSPredictor2<sup>3</sup> predictions) are shown below the corresponding A-domains. Amino acids appearing in the NRP VYLTV identified by NRPminer (with the lowest p-value) are shown in blue. The "Cys\*" represent Cys-derived thiazolidine in the lugdunin structure. (b) Spectral network formed by spectra that originate from the NRPs in the lugdunin family. The known lugdunin NRPs are shown in blue, while the green node represents the novel variant identified by NRPminer. (c) Structure of a known lugdunin synthesized by a non-canonical assembly line. (d) For each matched NRP, an annotated spectrum of a PSM yielding the lowest p-values ( $2.7 \times 10^{-21}$ ,  $3.6 \times 10^{-15}$ , and  $7.5 \times 10^{-15}$  from top to bottom) are shown.

### Surugamide BGC

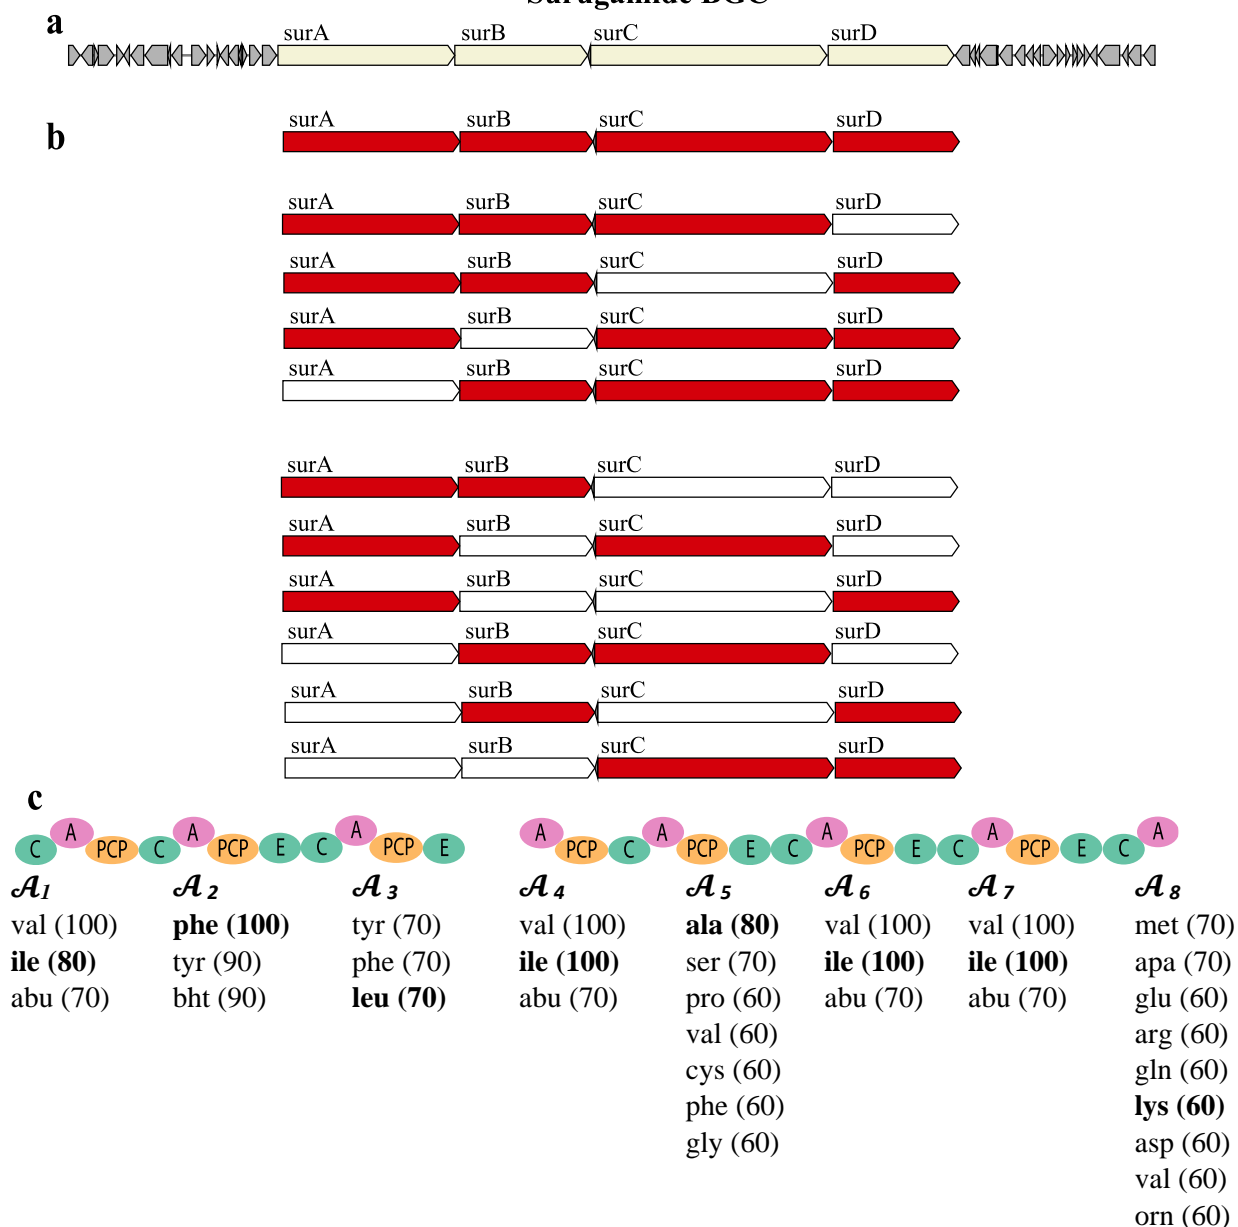

**Supplementary Figure 31. Surugamide BGC and the surugamide assembly line formed by the *SurA* and *SurD* genes.** (a) Surugamide BGC with four ORFs shown in yellow. (b) 11 assembly lines formed by deletion of zero, one and two ORFs (shown in red). NRPminer in the *OrfDel* mode explores all assembly lines generated by removing up to two ORFs. (c) The NRPS assembly line that synthesizes cyclic surugamides (formed by the *SurA* and *SurD* genes). At least three highest-scoring amino acids (along with their NRPSpredictor2<sup>3</sup> scores) are shown below each A-domain in this assembly line. Amino acids appearing in surugamide A are shown in bold. NRPminer considers all amino acids with the same score as the score of the third highest-scoring amino acid as illustrated in the case of the fifth and the eighth A-domains.

## Supplementary Tables

**Supplementary Table 1. The number of predicted core NRPs before and after filtering for 27 genomes in the XPF dataset.** The column "#NRP producing BGCs" show the number of NRP-producing BGCs. Columns under "#unique core NRPs" show the number of core NRPs generated by NRPminer before and after filtering for each genome. For example, in the case of the *X. szentirmaii* DSM genome with 8 NRP-producing BGCs, NRPminer considers 253,027,076,774 core NRPs before filtering, while after filtering only 57,888 cores are retained. The five species corresponding to the datasets yielding the novel NRP families are shown in blue.

| Strain                                 | #NRP producing BGCs | #unique core NRPs  |                 |
|----------------------------------------|---------------------|--------------------|-----------------|
|                                        |                     | before filtering   | after filtering |
| <i>Xenorhabdus bovienii</i> SS-2004    | 8                   | 8,973,905          | 7,701           |
| <i>Xenorhabdus nematophila</i> ATCC    | 6                   | 18,043,657,358     | 18,062          |
| <i>Xenorhabdus doucetiae</i> FRM16     | 8                   | 3,726,625,228      | 8,013           |
| <i>Xenorhabdus poinarii</i> G6         | 6                   | 14,280             | 658             |
| <i>Photorhabdus luminescens</i> PB45.5 | 10                  | 2,994,745,388,283  | 8,333           |
| <i>Photorhabdus asymbiotica</i> PB68.1 | 8                   | 157,964            | 2,602           |
| <i>Xenorhabdus</i> sp. DL20            | 9                   | 94,818             | 2,187           |
| <i>Xenorhabdus</i> sp. 30TX1           | 8                   | 76,044,111         | 7,287           |
| <i>Xenorhabdus vietnamensis</i>        | 15                  | 3,373,109,836      | 21,648          |
| <i>Xenorhabdus beddingii</i> DSM 4764  | 8                   | 13,721,302         | 2,998           |
| <i>Photorhabdus temperata</i>          | 9                   | 42,555,972,979,030 | 6,924           |
| <i>Photorhabdus asymbiotica</i> PB68.1 | 8                   | 160,034            | 5,136           |
| <i>Xenorhabdus budapestensis</i> 16342 | 7                   | 149,918,342        | 51,600          |
| <i>Xenorhabdus ehlersii</i> DSM 16337  | 10                  | 5,026,725          | 7,542           |
| <i>Xenorhabdus innexi</i> DSM 16336    | 10                  | 4,957,948,632      | 9,184           |
| <i>Xenorhabdus szentirmaii</i> US      | 8                   | 360,039,991,874    | 57,888          |
| <i>Xenorhabdus mauleonii</i>           | 10                  | 51,502,147,078     | 19,400          |
| <i>Xenorhabdus miraniensis</i>         | 14                  | 11,679,221,261     | 14,658          |
| <i>Xenorhabdus szentirmaii</i>         | 8                   | 253,027,076,774    | 57,888          |
| <i>Xenorhabdus</i> sp. KK7.4           | 9                   | 5,036,899,357      | 17,300          |
| <i>Xenorhabdus hominickii</i> DSM      | 13                  | 60,224,436         | 6,688           |
| <i>Xenorhabdus stockiae</i> DSM 17904  | 10                  | 1,159,012,484,964  | 7,896           |
| <i>Xenorhabdus ishibashii</i>          | 7                   | 19,911,786         | 2,547           |
| <i>Xenorhabdus</i> sp. KJ12.1          | 10                  | 11,916,878,760     | 10,458          |
| <i>Xenorhabdus kozodoi</i> DSM 17907   | 11                  | 87,750             | 2,192           |
| <i>Xenorhabdus cabanillasii</i> JM26   | 9                   | 80,529,848         | 47,856          |
| <i>Photorhabdus temperata</i>          | 11                  | 567,909,518,582    | 4,823           |

**Supplementary Table 2. PSMs identified by NRPminer in the XPF dataset representing the known NRP families.** For each NRP family, the information about the PSM with the lowest p-value among all PSMs corresponding to the spectra representing the known NRPS in that family is listed. The column “matched genome” shows the name of the organism whose BGCs generated the putative NRP structure corresponding to that PSM and the column “BGC position” shows the contig and the starting and ending nucleotide position of the BGC in that contig. Columns “precursor mass” and “charge” show the precursor mass and the charge state of matched spectrum. The p-values are computed based on MCMC approach using MS-DPR<sup>4</sup> with 10000 simulations.

| <b>NRP family name</b> | <b>matched genome</b>                     | <b>BGC position</b>     | <b>p-value</b>        | <b>precursor mass</b> | <b>charge</b> |
|------------------------|-------------------------------------------|-------------------------|-----------------------|-----------------------|---------------|
| GameXPeptide           | <i>Photorhabdus asymbiotica</i> PB68.1    | ctg1: 3584973 - 3640476 | $1.5 \times 10^{-25}$ | 586.394               | 1             |
| PAX peptide            | <i>Xenorhabdus nematophila</i> ATCC 19061 | ctg1: 11609 - 67919     | $9.9 \times 10^{-18}$ | 826.538               | 1             |
| Xenobactin             | <i>Xenorhabdus mauleonii</i> DSM 17908    | ctg11: 65321 - 162527   | $5.0 \times 10^{-21}$ | 756.425               | 1             |
| Szentiamide            | <i>Xenorhabdus szentirmaii</i> DSM 16338  | ctg1: 762001 - 821352   | $7.0 \times 10^{-31}$ | 838.404               | 1             |
| Taxllaid               | <i>Xenorhabdus bovienii</i> SS-2004       | ctg1: 739318 - 804275   | $1.2 \times 10^{-30}$ | 808.55                | 1             |
| Xentrivalpeptide       | <i>Xenorhabdus</i> sp. KK7.4              | ctg14: 6760-112451      | $6.4 \times 10^{-37}$ | 430.749               | 2             |
| Ambactin               | <i>Xenorhabdus miraniensis</i> DSM 17902  | ctg6: 132143-191993     | $5.4 \times 10^{-16}$ | 751.41                | 1             |
| Xenoamicin             | <i>Xenorhabdus vietnamensis</i> DSM 22392 | ctg9: 1-75156           | $3.3 \times 10^{-56}$ | 1300.8                | 1             |
| Rhabdopeptide          | <i>Xenorhabdus stockiae</i> DSM 17904     | ctg14: 1-77935          | $6.1 \times 10^{-17}$ | 599.427               | 1             |

**Supplementary Table 3. Sum formula of protegomyacin (PRT) derivatives.** Sum formula of the PRT variants identified via HPLC-MS analysis in extracts from *X. doucetiae*, *X. poinarii* and 30TX1.

| Strain              | Protegomycin (PRT) | <i>m/z</i> | sum formula                                                    | $\Delta$ ppm |
|---------------------|--------------------|------------|----------------------------------------------------------------|--------------|
| <i>X. doucetiae</i> | PRT-1037           | 1037.4679  | C <sub>57</sub> H <sub>64</sub> N <sub>8</sub> O <sub>11</sub> | 8.5          |
|                     | PRT-1051           | 1051.4830  | C <sub>58</sub> H <sub>66</sub> N <sub>8</sub> O <sub>11</sub> | 8.9          |
|                     | PRT-1065           | 1065.4953  | C <sub>59</sub> H <sub>68</sub> N <sub>8</sub> O <sub>11</sub> | 11.8         |
|                     | PRT-1012           | 1012.4723  | C <sub>56</sub> H <sub>65</sub> N <sub>7</sub> O <sub>11</sub> | 9.0          |
|                     | PRT-1021           | 1021.4723  | C <sub>57</sub> H <sub>64</sub> N <sub>8</sub> O <sub>10</sub> | 9.3          |
|                     | PRT-1046           | 1046.4551  | C <sub>59</sub> H <sub>63</sub> N <sub>7</sub> O <sub>11</sub> | 10.2         |
|                     | PRT-1085           | 1085.4665  | C <sub>61</sub> H <sub>64</sub> N <sub>8</sub> O <sub>11</sub> | 9.4          |
| <i>X. poinarii</i>  | PRT-945            | 945.4294   | C <sub>54</sub> H <sub>56</sub> N <sub>8</sub> O <sub>8</sub>  | 4.1          |
|                     | PRT-929            | 929.4345   | C <sub>54</sub> H <sub>56</sub> N <sub>8</sub> O <sub>7</sub>  | 2.8          |
|                     | PRT-922            | 922.4106   | C <sub>52</sub> H <sub>55</sub> N <sub>7</sub> O <sub>9</sub>  | 3.1          |
|                     | PRT-911            | 911.4439   | C <sub>51</sub> H <sub>58</sub> N <sub>8</sub> O <sub>8</sub>  | 1.3          |
| 30TX1               | PRT-1108           | 1108.4841  | C <sub>63</sub> H <sub>65</sub> N <sub>9</sub> O <sub>10</sub> | 7.8          |
|                     | PRT-1092           | 1092.4920  | C <sub>63</sub> H <sub>65</sub> N <sub>9</sub> O <sub>9</sub>  | 5.3          |
|                     | PRT-1076           | 1076.5029  | C <sub>63</sub> H <sub>65</sub> N <sub>9</sub> O <sub>8</sub>  | 4.7          |



**Supplementary Table 4.  $^1\text{H}$  (500 MHz) and  $^{13}\text{C}$  (125 MHz) NMR spectroscopic data for PRT-1037.**  $^1\text{H}$  (500 MHz) and  $^{13}\text{C}$  (125 MHz) NMR spectroscopic data for PRT-1037 in DMSO- $d_6$  ( $\delta$  in ppm and  $J$  in Hz).

| no. | PRT-1037                   |                                   |
|-----|----------------------------|-----------------------------------|
|     | $\delta_{\text{C}}$ , type | $\delta_{\text{H}}$ (mult., $J$ ) |
| 1   | 14.25                      | 0.88 (d, 7.4)                     |
| 2   | 18.76                      | 1.59 (dq, 14.6, 7.2)              |
| 3   | 37.45                      | 2.21 (t, 7.2)                     |
| 4   | 174.41                     |                                   |
| 5   |                            | 8.27 (br s)                       |
| 6   | 56.00                      | 4.08 (m)                          |
| 7   | 31.04                      | 1.48 (m)                          |
| 8   | 22.58                      | 1.42 (br s)                       |
| 9   | 27.98                      | 1.42 (overlap)                    |
| 10  | 38.17                      | 3.31 (m)<br>2.78 (m)              |
| 11  |                            | 7.62 (br s)                       |
| 12  | 171.73                     |                                   |
| 13  | 55.39                      | 4.35 (m)                          |
| 14  | 27.05                      | 3.20 (m)<br>3.03 (dd, 14.7, 9.0)  |
| 15  | 110.82                     |                                   |
| 16  | 123.95                     | 7.22 (d, 1.9)                     |
| 17  |                            | 10.86 (br s)                      |
| 18  | 136.59                     |                                   |
| 19  | 111.85                     | 7.59 (d, 8.0)                     |
| 20  | 118.82                     | 7.00 (t, 7.2)                     |
| 21  | 121.43                     | 7.08 (t, 7.2)                     |
| 22  | 118.74                     | 7.35 (d, 8.0)                     |
| 23  | 127.67                     |                                   |
| 24  |                            | 8.11 (br s)                       |
| 25  | 171.83                     |                                   |
| 26  | 55.83                      | 4.22 (m)                          |
| 27  | 37.12                      | 2.60 (m)<br>2.53 (overlap)        |
| 28  | 128.14                     |                                   |
| 29  | 130.32                     | 6.81 (d, 8.5)                     |
| 30  | 115.28                     | 6.60 (d, 8.5)                     |
| 31  | 156.27                     |                                   |
| 32  | 115.28                     | 6.60 (d, 8.5)                     |
| 33  | 130.32                     | 6.81 (d, 8.5)                     |
| 34  |                            | 8.11 (d, 6.6)                     |
| 35  | 171.68                     |                                   |
| 36  | 56.35                      | 4.22 (overlap)                    |
| 37  | 37.26                      | 2.92 (overlap)<br>2.80 (overlap)  |
| 38  | 128.69                     |                                   |
| 39  | 130.58                     | 6.81 (overlap)                    |
| 40  | 115.42                     | 6.61 (overlap)                    |
| 41  | 156.07                     |                                   |
| 42  | 115.42                     | 6.61 (overlap)                    |
| 43  | 130.58                     | 6.81 (overlap)                    |
| 44  |                            | 8.11 (overlap)                    |
| 45  | 171.92                     |                                   |
| 46  | 55.76                      | 4.22 (overlap)                    |
| 47  | 36.3                       | 2.92 (overlap)                    |

|    |        |                |
|----|--------|----------------|
|    |        | 2.80 (overlap) |
| 48 | 128.67 |                |
| 49 | 130.80 | 6.81 (overlap) |
| 50 | 115.21 | 6.61 (overlap) |
| 51 | 156.20 |                |
| 52 | 115.21 | 6.61 (overlap) |
| 53 | 130.80 | 6.81 (overlap) |
| 54 |        | 8.05 (d, 6.6)  |
| 55 | 171.06 |                |
| 56 | 55.53  | 3.96 (m)       |
| 57 | 34.70  | 2.92 (overlap) |
|    |        | 2.80 (overlap) |
| 58 | 128.48 |                |
| 59 | 130.61 | 6.81 (overlap) |
| 60 | 115.32 | 6.61 (overlap) |
| 61 | 156.29 |                |
| 62 | 115.32 | 6.61 (overlap) |
| 63 | 130.61 | 6.81 (overlap) |
| 64 |        | 8.05 (overlap) |
| 65 | 173.61 |                |

---

**Supplementary Table 5. NMR spectroscopic data (600 MHz (<sup>1</sup>H), 125 MHz (<sup>13</sup>C) in CDCl<sub>3</sub>) of XAM-1320.** NMR spectroscopic data (600 MHz (<sup>1</sup>H), 125 MHz (<sup>13</sup>C) in CDCl<sub>3</sub>) of XAM-1320; δ in ppm; HM, hexanoyl moiety.

| Spin Sys. | Pos.  | δ <sub>C</sub> | δ <sub>H</sub> |          |       |        |      |
|-----------|-------|----------------|----------------|----------|-------|--------|------|
| 1-HM      | C=O   | 173.73         |                |          | β     | 61.22  | 4.52 |
|           |       |                |                |          | γ     | 20.00  | 1.28 |
|           | α     | 36.12          | 2.23           | 9-Leu    | C=O   | 170.61 |      |
|           | β     | 31.64          | 1.28           |          | NH    |        | 7.46 |
|           | γ     | 25.46          | 1.66           |          | α     | 51.28  | 4.76 |
|           | δ     | 22.50          | 1.29           |          | β     | 41.18  | 1.72 |
| ε         | 14.00 | 0.88           | β              |          |       | 1.49   |      |
|           |       |                | γ              |          | 24.88 | 1.53   |      |
| 2-Thr     | C=O   | 172.09         |                |          | δ1    | 22.64  | 0.93 |
|           | NH    |                | 8.38           |          | δ2    | 22.56  | 0.98 |
|           | α     | 58.41          | 4.74           | 10-Val   | C=O   | 171.95 |      |
|           | β     | 67.43          | 4.78           |          | NH    |        | 8.73 |
|           | γ     | 19.14          | 1.18           |          | α     | 60.71  | 3.76 |
|           |       |                | β              |          | 29.43 | 2.07   |      |
|           |       |                | γ1             |          | 19.21 | 0.86   |      |
| 3-Ala     | C=O   | 172.48         |                |          | γ2    | 19.00  | 0.89 |
|           | NH    |                | 7.10           | 11-β-Ala | C=O   | 172.09 |      |
|           | α     | 47.25          | 4.66           |          | NH    |        | 6.49 |
|           | α     | 14.87          | 1.41           |          | α     | 37.00  | 3.81 |
|           |       |                | α              |          |       | 3.24   |      |
| 4-Val     | C=O   | 172.44         |                |          | β     | 35.66  | 3.24 |
|           | NH    |                | 7.51           |          | β     |        | 2.25 |
|           | α     | 59.32          | 4.26           | 12-β-Ala | C=O   | 172.27 |      |
|           | β     | 30.60          | 1.94           |          | NH    |        | 7.53 |
|           | γ1    | 19.10          | 1.00           |          | α     | 33.89  | 4.06 |
|           | γ2    | 19.10          | 0.94           |          | α     |        | 3.52 |
|           |       |                | β              |          | 35.26 | 2.71   |      |
|           |       |                | β              |          |       | 2.47   |      |
| 5-Leu     | C=O   | 169.95         |                | 13-Pro   | C=O   | 172.83 |      |
|           | NH    |                | 8.50           |          | α     | 60.67  | 4.57 |
|           | α     | 50.31          | 4.44           |          | β     | 29.64  | 2.25 |
|           | β     | 39.28          | 1.70           |          | β     |        | 2.07 |
|           | β     |                | 1.56           |          | γ     | 24.33  | 2.00 |
|           | γ     | 24.84          | 1.53           |          | γ     |        | 1.93 |
|           | δ1    | 22.68          | 0.89           |          | δ     | 47.46  | 3.68 |
|           | δ2    | 22.28          | 0.88           |          | δ     |        | 3.40 |
| 6-Leu     | C=O   | 173.20         |                | 14-β-Ala | C=O   | 170.71 |      |
|           | NH    |                | 7.48           |          | NH    |        | 6.56 |
|           | α     | 51.48          | 5.01           |          | α     | 36.31  | 3.58 |
|           | β     | 39.09          | 1.65           |          | α     |        | 3.35 |
|           | γ     | 24.97          | 1.64           |          | β     | 33.81  | 2.78 |
|           | δ1    | 22.34          | 0.97           |          | β     |        | 2.34 |
|           | δ2    | 21.95          | 0.90           |          |       |        |      |
|           |       |                |                |          |       |        |      |
| 7-Thr     | C=O   | 169.44         |                |          |       |        |      |
|           | NH    |                | 8.64           |          |       |        |      |
|           | α     | 69.34          | 5.26           |          |       |        |      |
|           | β     | 57.76          | 4.33           |          |       |        |      |
|           | γ     | 17.37          | 1.25           |          |       |        |      |
| 8-Thr     | C=O   | 170.65         |                |          |       |        |      |
|           | NH    |                | 8.91           |          |       |        |      |
|           | α     | 65.84          | 4.12           |          |       |        |      |

**Supplementary Table 6. ROE list for XAM-1320 NRP.** ROE list with upper and lower distance restraint limits (90%, 110%) including pseudoatom correction from experimentally determined distance for 3D modelling of XAM-1320. Average distance and average violation of single distance restraints over ten conformations from the final MD trajectory (after energy minimization) are shown.

| ROEs            |                 |       |       |         |         |
|-----------------|-----------------|-------|-------|---------|---------|
| ATOM1           | ATOM2           | LOWER | UPPER | AV_DIST | AV_VIOL |
| 8-THR NH        | 8-THR $\gamma$  | 4     | 5.8   | 4.45    | 0       |
| 8-THR NH        | 3-ALA $\gamma$  | 4     | 5.8   | 4.01    | 0       |
| 8-THR NH        | 8-THR $\beta$   | 2.5   | 3.1   | 2.92    | 0       |
| 4-VAL $\alpha$  | 8-THR NH        | 2.8   | 3.4   | 2.86    | 0       |
| 7-THR $\alpha$  | 8-THR NH        | 2.2   | 2.7   | 2.42    | 0       |
| 8-THR $\alpha$  | 8-THR NH        | 2.9   | 3.5   | 2.71    | 0.19    |
| 7-THR $\beta$   | 8-THR NH        | 3.5   | 4.3   | 3.82    | 0       |
| 10-VAL NH       | 10-VAL $\beta$  | 2.6   | 3.2   | 2.41    | 0.19    |
| 10-VAL $\alpha$ | 10-VAL NH       | 3     | 3.7   | 2.88    | 0.12    |
| 9-LEU $\alpha$  | 10-VAL NH       | 2.2   | 2.6   | 2.44    | 0       |
| 6-LEU $\alpha$  | 10-VAL NH       | 3.1   | 3.8   | 4.33    | 0.53    |
| 7-THR NH        | 7-THR $\gamma$  | 3.6   | 5.5   | 4.2     | 0       |
| 7-THR $\alpha$  | 7-THR NH        | 2.87  | 3.5   | 2.8     | 0.07    |
| 6-LEU $\alpha$  | 7-THR NH        | 2     | 2.5   | 2.52    | 0.02    |
| 7-THR NH        | 7-THR $\beta$   | 2.8   | 3.4   | 2.85    | 0       |
| 5-LEU NH        | 8-THR $\alpha$  | 3.6   | 4.4   | 4.83    | 0.43    |
| 4-VAL $\alpha$  | 5-LEU NH        | 2.1   | 2.6   | 2.35    | 0       |
| 5-LEU NH        | 7-THR $\alpha$  | 3.3   | 4.1   | 4.15    | 0.05    |
| 5-LEU $\alpha$  | 5-LEU NH        | 2.8   | 3.4   | 2.94    | 0       |
| 2-THR NH        | 2-THR $\gamma$  | 2.5   | 4     | 3.63    | 0       |
| 2-THR NH        | Acyl $\alpha$   | 2.4   | 3.9   | 2.87    | 0       |
| 2-THR NH        | Acyl $\beta$    | 2.6   | 4     | 3.43    | 0       |
| 2-THR NH        | 3-ALA NH        | 2.3   | 2.8   | 2.81    | 0.01    |
| 2-THR NH        | 4-VAL NH        | 3.3   | 4.1   | 4.27    | 0.17    |
| 7-THR $\alpha$  | 12-ALA NH       | 3.6   | 4.4   | 5.07    | 0.68    |
| 8-THR $\alpha$  | 12-ALA NH       | 3.2   | 3.9   | 4.21    | 0.31    |
| 5-LEU NH        | 8-THR NH        | 4.2   | 5.2   | 4.36    | 0       |
| 10-VAL NH       | 10-VAL $\gamma$ | 3.1   | 4.8   | 3.63    | 0       |
| 7-THR $\beta$   | 12-ALA NH       | 3.7   | 4.5   | 3.38    | 0.32    |
| 4-VAL NH        | 3-ALA $\gamma$  | 4.3   | 6.2   | 4.5     | 0       |
| 4-VAL NH        | 4-VAL $\beta$   | 2.7   | 3.3   | 3.1     | 0       |
| 4-VAL $\alpha$  | 4-VAL NH        | 2.7   | 3.4   | 2.84    | 0       |
| 4-VAL NH        | 3-ALA $\alpha$  | 2.1   | 2.6   | 2.7     | 0.1     |
| 2-THR $\alpha$  | 4-VAL NH        | 3.6   | 4.5   | 4.26    | 0       |
| 2-THR $\beta$   | 4-VAL NH        | 3.3   | 4.1   | 2.89    | 0.41    |
| 4-VAL NH        | 3-ALA NH        | 3.4   | 4.2   | 2.97    | 0.43    |
| 6-LEU NH        | 6-LEU $\beta$   | 2.4   | 3.9   | 2.45    | 0       |
| 5-LEU $\alpha$  | 6-LEU NH        | 2.1   | 2.6   | 2.26    | 0       |
| 6-LEU $\alpha$  | 6-LEU NH        | 2.7   | 3.4   | 3.01    | 0       |
| 9-LEU NH        | 8-THR $\gamma$  | 3.7   | 5.5   | 4.35    | 0       |
| 2-THR $\beta$   | 9-LEU NH        | 3.8   | 4.6   | 4.74    | 0.14    |
| 8-THR $\alpha$  | 9-LEU NH        | 2     | 2.5   | 2.34    | 0       |
| 9-LEU $\alpha$  | 9-LEU NH        | 2.7   | 3.3   | 3.06    | 0       |
| 3-ALA NH        | 7-THR $\gamma$  | 3.5   | 5.3   | 3.23    | 0.27    |
| 3-ALA NH        | Acyl $\alpha$   | 3.4   | 5.1   | 3.64    | 0       |
| 3-ALA NH        | 7-THR $\alpha$  | 3     | 3.7   | 2.76    | 0.24    |
| 3-ALA $\alpha$  | 3-ALA NH        | 2.7   | 3.4   | 3.01    | 0       |
| 2-THR $\alpha$  | 3-ALA NH        | 3     | 3.6   | 3.7     | 0.1     |
| 2-THR $\beta$   | 3-ALA NH        | 3.5   | 4.2   | 4.22    | 0.01    |
| 7-THR $\beta$   | 7-THR $\gamma$  | 2.4   | 2.9   | 2.49    | 0       |

|           |           |     |      |      |      |
|-----------|-----------|-----|------|------|------|
| 7-THR β   | 3-ALA γ   | 4   | 5.9  | 5.75 | 0    |
| 7-THR β   | Acyl α    | 3.1 | 4.7  | 5.09 | 0.39 |
| 6-LEU α   | 10-VAL β  | 2.5 | 3    | 3.42 | 0.42 |
| 9-LEU α   | 9-LEU δ   | 2.6 | 4.2  | 4.67 | 0.47 |
| 9-LEU α   | 9-LEU δ   | 2.6 | 4.2  | 3.17 | 0    |
| 2-THR β   | 2-THR γ   | 2.2 | 3.7  | 2.47 | 0    |
| 2-THR α   | 2-THR γ   | 2.3 | 3.8  | 2.88 | 0    |
| 3-ALA α   | 3-ALA γ   | 2.1 | 3.6  | 2.66 | 0    |
| 13-PRO α  | 8-THR γ   | 2.6 | 4.2  | 3.58 | 0    |
| 13-PRO α  | 13-PRO δ  | 2.6 | 3.2  | 3.48 | 0.28 |
| 13-PRO α  | 13-PRO δ  | 3.6 | 4.5  | 4.15 | 0    |
| 13-PRO α  | 13-PRO β  | 2.6 | 3.2  | 2.24 | 0.36 |
| 8-THR α   | 8-THR γ   | 2.3 | 3.9  | 2.82 | 0    |
| 5-LEU α   | 5-LEU δ   | 2.4 | 3.9  | 3.59 | 0    |
| 5-LEU α   | 5-LEU γ   | 2.6 | 3.15 | 2.51 | 0.09 |
| 7-THR α   | 7-THR γ   | 2.4 | 3.9  | 3.09 | 0    |
| 7-THR α   | 3-ALA γ   | 2.6 | 4.2  | 4.19 | 0    |
| 4-VAL β   | 7-THR α   | 3.6 | 4.5  | 5.01 | 0.51 |
| 4-VAL α   | 4-VAL β   | 2.7 | 3.3  | 2.38 | 0.32 |
| 4-VAL α   | 8-THR β   | 2.1 | 2.6  | 2.34 | 0    |
| 4-VAL α   | 4-VAL γ   | 2.5 | 3.1  | 3.7  | 0.6  |
| 4-VAL α   | 4-VAL γ   | 2.5 | 3.1  | 3.16 | 0.06 |
| 8-THR β   | 4-VAL γ   | 2.2 | 3.7  | 3.36 | 0    |
| 8-THR β   | 4-VAL γ   | 3.1 | 4.8  | 5.15 | 0.35 |
| 8-THR β   | 8-THR γ   | 3   | 4.6  | 2.71 | 0.29 |
| 10-VAL α  | 10-VAL γ  | 2.5 | 4.1  | 3.44 | 0    |
| 10-VAL α  | 10-VAL γ  | 2.5 | 4.1  | 3.04 | 0    |
| 10-VAL α  | 10-VAL β  | 2.8 | 3.4  | 3    | 0    |
| 12-ALA α1 | 12-ALA NH | 2.4 | 3    | 2.27 | 0.13 |
| 12-ALA α1 | 12-ALA β1 | 2.5 | 3    | 2.58 | 0    |
| 12-ALA α2 | 12-ALA β2 | 2.4 | 3    | 2.57 | 0    |
| 12-ALA α2 | 12-ALA β1 | 3.3 | 4.1  | 3.16 | 0.14 |
| 12-ALA β1 | 13-PRO δ  | 2.6 | 3.2  | 3.46 | 0.26 |
| 12-ALA β1 | 13-PRO δ  | 2.2 | 2.7  | 2.48 | 0    |
| 12-ALA β2 | 13-PRO δ  | 2.3 | 2.8  | 2.56 | 0    |
| 12-ALA β2 | 13-PRO δ  | 2.8 | 3.5  | 2.61 | 0.19 |
| 14-ALA α1 | 14-ALA β1 | 2.4 | 3.1  | 2.6  | 0    |
| 14-ALA β1 | 14-ALA α2 | 2.4 | 3.1  | 3.15 | 0.05 |
| 14-ALA α1 | 14-ALA β2 | 2.4 | 3.1  | 2.68 | 0    |
| 14-ALA β1 | 14-ALA α2 | 2.4 | 3.1  | 2.61 | 0    |
| 12-ALA β1 | 14-ALA NH | 3.3 | 4.1  | 3.53 | 0    |
| 12-ALA α1 | 12-ALA NH | 3.4 | 4.2  | 3.12 | 0.28 |
| 12-ALA α2 | 12-ALA NH | 2.4 | 3    | 2.37 | 0.03 |
| 12-ALA NH | 12-ALA β1 | 3.5 | 4.4  | 3.36 | 0.14 |
| 12-ALA β1 | 12-ALA NH | 2.3 | 2.8  | 2.44 | 0    |
| 9-LEU NH  | 12-ALA α2 | 2.6 | 3.3  | 2.88 | 0    |
| 8-THR NH  | 14-ALA α  | 3.8 | 5.5  | 3.58 | 0.22 |
| 8-THR NH  | 14-ALA β  | 3.9 | 5.7  | 4.89 | 0    |
| 7-Thr NH  | 14-ALA α  | 3.6 | 5.3  | 4.47 | 0    |
| 5-LEU NH  | 5-LEU β   | 3   | 3.9  | 2.43 | 0.57 |
| 5-LEU NH  | 5-LEU β   | 3.2 | 3.9  | 3.74 | 0    |
| 5-LEU NH  | 9-LEU α   | 3.1 | 3.8  | 3.9  | 0.1  |
| 4-VAL NH  | 4-VAL γ   | 3   | 3.7  | 2.76 | 0.24 |
| 4-VAL NH  | 4-VAL γ   | 3.6 | 4.4  | 4.64 | 0.24 |
| 9-LEU NH  | 9-LEU β   | 3.1 | 3.8  | 2.53 | 0.57 |
| 9-LEU NH  | 9-LEU β   | 3.3 | 4    | 3.78 | 0    |
| 6-LEU α   | 6-LEU β   | 2.6 | 4.3  | 2.59 | 0.01 |
| 9-LEU α   | 9-LEU β   | 2.6 | 4.1  | 2.53 | 0.07 |

|                 |                   |     |      |      |      |
|-----------------|-------------------|-----|------|------|------|
| 5-LEU $\alpha$  | 5-LEU $\beta$     | 2.4 | 3.9  | 2.82 | 0    |
| 9-LEU $\alpha$  | 10-VAL $\gamma$   | 3.2 | 4.9  | 4.23 | 0    |
| 7-THR $\beta$   | 12-ALA $\alpha$ 1 | 3.4 | 4.2  | 4.36 | 0.16 |
| 7-THR $\beta$   | 12-ALA $\beta$ 1  | 2   | 2.5  | 2.26 | 0    |
| 13-PRO $\alpha$ | 14-ALA $\beta$    | 4.3 | 6.1  | 6.27 | 0.17 |
| 8-THR $\alpha$  | 14-ALA $\alpha$   | 3.1 | 4.8  | 4.42 | 0    |
| 7-THR $\alpha$  | 14-ALA $\alpha$   | 3.5 | 5.12 | 5.26 | 0.14 |
| 7-THR $\alpha$  | 12-ALA $\beta$ 2  | 3   | 3.7  | 4.45 | 0.75 |
| 11-ALA NH       | 10-VAL $\gamma$   | 3.4 | 4.2  | 3.68 | 0    |
| 14-ALA NH       | 13-PRO $\gamma$   | 3.5 | 5.2  | 3.41 | 0.09 |
| 13-PRO $\alpha$ | 14-ALA NH         | 2.9 | 3.6  | 3.51 | 0    |
| 14-ALA NH       | 13-PRO $\delta$   | 2.9 | 3.6  | 3.07 | 0    |
| 8-THR $\alpha$  | 14-ALA NH         | 3.1 | 3.8  | 4.06 | 0.26 |

---

Average Restraint Violation: 0.114

Average RMS RestrViolation: 0.116

---

**Supplementary Table 7. The number of predicted core NRPs before and after filtering for the genomes of the 20 soil-dwelling Actinobacteria strains in SoilActi.** The columns show the number of NRP-producing BGCs (column "#NRP-producing BGC") along with the number core NRPs generated by the canonical and non-canonical assembly lines for each genome before and after filtering by NRPminer using OrfDel option. Column "removing no ORFs" shows the number of core NRPs generated from the canonical assembly lines before and after filtering. For example, in the case of *S. albus* genome, NRPminer produces 102,852,968,758 core NRPs before filtering, while after filtering only 2,368 core NRPs are retained. Column "removing one ORF" shows the number of core NRPs generated from all non-canonical assembly lines resulting from removing A-domains encoded by one ORF on the corresponding BGC, before and after filtering with NRPminer. Column "removing two ORFs" shows this figure for non-canonical assembly lines generated by removing A-domains encoded by two ORFs. Column "total" shows the total number of core NRPs before and after filtering across all considered assembly lines for each organism. The strains corresponding to the datasets yielding the novel NRPs in SoilActi are shown in blue.

| strain          | #NRP-producing BGCs | #unique core NRPs before / after filtering generated by different assembly lines |                     |                   |                        |
|-----------------|---------------------|----------------------------------------------------------------------------------|---------------------|-------------------|------------------------|
|                 |                     | removing no ORFs                                                                 | removing one ORF    | removing two ORFs | total                  |
| SCNY228         | 3                   | 2,369/102,852,968,758                                                            | 5,759/1,537,478,841 | 7,483/4023,756    | 15,611/104,394,471,355 |
| <i>albus</i>    | 3                   | 3,189/25,713,264,922                                                             | 5,788/473,652,036   | 7,471/2237,220    | 16,460/2,618,9154,178  |
| CNS654          | 5                   | 1,560/21,499,085,734                                                             | 3,870/87,589,011    | 2,331/45,216      | 7,761/21,586,719,961   |
| griseoflav      | 7                   | 3,235/17,916,143,265                                                             | 6,431/75,146,556    | 2,484/45,695      | 12,150/17,991,335,516  |
| hygro           | 5                   | 3,753/79,748,772                                                                 | 12,887/27,905,444   | 11,964/5481,248   | 28,604/113,135,464     |
| 15998           | 3                   | 2,436/19,088,674                                                                 | 8,084/49,356,874    | 19,156/43,902,448 | 29,676/112,347,996     |
| coelicolor      | 3                   | 1,191/787,524                                                                    | 1,693/75,438        | 91/819            | 2,975/863,781          |
| lividan         | 2                   | 1,032/262,476                                                                    | 2,662/178,686       | 1,572/31644       | 5,266/472,806          |
| ghana           | 2                   | 1,666/115,488                                                                    | 5,516/246,416       | 6,137/146728      | 13,319/508,632         |
| kutzneria       | 9                   | 4,983/47,046                                                                     | 9,866/73,172        | 5,748/53050       | 20,597/173,268         |
| <i>aa4</i>      | 2                   | 1,381/111,780                                                                    | 798/2,554           | 103/351           | 2,282/114,685          |
| CNB091          | 3                   | 960/29,448                                                                       | 603/16,976          | 290/3124          | 1,853/49,548           |
| cattleya        | 4                   | 1,300/23,068                                                                     | 1,475/6,165         | 77/225            | 2,852/29,458           |
| 11379           | 4                   | 1,643/6,853                                                                      | 2,800/11,961        | 1,632/6,882       | 6,075/25,696           |
| griseoflav      | 2                   | 2,173/15,488                                                                     | 1,240/3,016         | 368/368           | 3,771/18,872           |
| tu6071          | 4                   | 1,674/10,638                                                                     | 0/0                 | 0/0               | 1,674/10,638           |
| pristin         | 2                   | 864/864                                                                          | 279/279             | 0/0               | 1,143/1,143            |
| afghan          | 0                   | 252/252                                                                          | 288/288             | 72/72             | 612/612                |
| e14             | 1                   | 240/240                                                                          | 0/0                 | 0/0               | 240/240                |
| viridochromoges | 1                   | 36/36                                                                            | 0/0                 | 0/0               | 36/36                  |

**Supplementary Table 8. Amino acid sequences of the 19 NRPs identified by NRPminer appearing in spectral network presented in Supplementary Figure 2.b (with the lowest p-value among the PSMs corresponding to all spectra originating from the same NRP).** The known surugamide variants are shown in green. The column "predicted aa sequence" shows the sequence of corresponding NRPs as predicted by NRPminer. The "[+14]" represents addition of [+14.01Da] and "[+28]" represents addition of [+28.03Da]. Column "precursor mass" shows the precursor mass of the matched spectra and the column "p-value" presents the p-value of the corresponding PSMs. The p-values are computed based on MCMC approach using MS-DPR<sup>4</sup> with 10000 simulations.

| <b>predicted aa Sequence</b> | <b>precursor mass</b> | <b>p-value</b>        |
|------------------------------|-----------------------|-----------------------|
| IAI---FL                     | 558.37                | $9.2 \times 10^{-16}$ |
| IAV--IFL                     | 657.44                | $4.9 \times 10^{-19}$ |
| IAI--IFL                     | 671.45                | $3.1 \times 10^{-32}$ |
| IAII-IFL                     | 770.52                | $3.1 \times 10^{-27}$ |
| IAV-KVFL                     | 771.52                | $1.3 \times 10^{-44}$ |
| IAII-IFL                     | 784.54                | $3.5 \times 10^{-20}$ |
| IAV-KIFL                     | 785.53                | $8.1 \times 10^{-47}$ |
| IAI-KIFL                     | 799.55                | $6.4 \times 10^{-43}$ |
| IAI-[+14]KIFL                | 813.56                | $5.6 \times 10^{-50}$ |
| VAVVKVFL                     | 856.57                | $4.9 \times 10^{-45}$ |
| IAIVKIIL                     | 864.63                | $4.1 \times 10^{-55}$ |
| IADVVKVFL                    | 870.59                | $8.7 \times 10^{-73}$ |
| IAIIKIIL                     | 878.65                | $1.4 \times 10^{-27}$ |
| IADVKIFL                     | 884.60                | $2.6 \times 10^{-59}$ |
| IAIVKIFL                     | 898.62                | $3.3 \times 10^{-67}$ |
| IAIIKIFL                     | 912.63                | $6.9 \times 10^{-65}$ |
| IAIVKIYL                     | 914.61                | $3.5 \times 10^{-43}$ |
| IAII [+14]KIFL               | 926.65                | $1.3 \times 10^{-56}$ |
| IAII [+28]KIYL               | 928.63                | $1.9 \times 10^{-56}$ |



**Supplementary Table 9. PSMs identified by NRPminer in the TinyEarth dataset representing the known NRP families.** For each NRP family, the information about the PSM with the lowest p-value among all PSMs corresponding to the spectra representing the NRPs in that family, is listed. The column “matched genome” shows the name of the organism whose BGCs generated the putative NRP structure corresponding to the listed PSM and the column “BGC position” presents the contig and the starting and ending nucleotide position of the BGC in that contig. Columns “precursor mass” and “charge” list the precursor mass and the charge state of the matched spectra. The p-values are computed based on MCMC approach using MS-DPR<sup>4</sup> with 10000 simulations.

| <b>NRP family name</b> | <b>matched genome</b>                           | <b>BGC position</b>         | <b>p-value</b>        | <b>precursor mass</b> | <b>charge</b> |
|------------------------|-------------------------------------------------|-----------------------------|-----------------------|-----------------------|---------------|
| Surfactin              | <i>Bacillus amyloliquefaciens</i> sp. GZYCT-4-2 | ctg1: 416695 - 482102       | $1.6 \times 10^{-46}$ | 1036.7                | 1             |
| Plipastatin            | <i>Bacillus amyloliquefaciens</i> sp. GZYCT-4-2 | ctg1: 2727818 - 2749701     | $7.0 \times 10^{-55}$ | 731.4                 | 2             |
| Arthrofactin           | <i>Pseudomonas baetica</i> sp. 04-6(1)          | ctg1: 3,566,169 - 3,642,017 | $2.7 \times 10^{-39}$ | 1354.8                | 2             |

**Supplementary Table 10. NRPminer-generated PSMs representing all known surfactins<sup>6</sup> and plipastatins<sup>7,8</sup> identified in spectra<sub>TinyEarth</sub> dataset.** For each known NRP, the PSM with the lowest p-value among all PSMs corresponding to the spectra generated from that NRP, is listed. The columns "core NRP aa sequence" and "structure" presents the core NRP and the backbone structure of each variant identified in TinyEarth dataset. Column "precursor mass" and "charge" lists the precursor mass and the charge state of the matched spectra. The p-values are computed based on MCMC approach using MS-DPR<sup>4</sup> with 10000 simulations.

| <b>NRP family name</b> | <b>core NRP aa sequence</b> | <b>structure</b> | <b>precursor mass</b> | <b>p-value</b>        | <b>charge</b> |
|------------------------|-----------------------------|------------------|-----------------------|-----------------------|---------------|
| <b>Surfactins</b>      | ELLVDLL                     | cyclic           | 966.5                 | $2.5 \times 10^{-23}$ | 1             |
|                        | ELLVDLL                     | cyclic           | 980.6                 | $3.4 \times 10^{-30}$ | 1             |
|                        | ELLVDLL                     | cyclic           | 994.7                 | $4.0 \times 10^{-35}$ | 1             |
|                        | ELLVDLL                     | cyclic           | 1008.7                | $2.9 \times 10^{-45}$ | 1             |
|                        | ELLVDLL                     | linear           | 1012.7                | $2.1 \times 10^{-17}$ | 1             |
|                        | ELLIDLL                     | cyclic           | 1022.7                | $1.5 \times 10^{-41}$ | 1             |
|                        | ELLVDLL                     | linear           | 1026.7                | $3.3 \times 10^{-19}$ | 1             |
|                        | ELLVDLL                     | cyclic           | 1029.7                | $8.1 \times 10^{-20}$ | 1             |
|                        | ELLIDLL                     | cyclic           | 1036.7                | $1.6 \times 10^{-46}$ | 1             |
|                        | ELLVDLL                     | linear           | 1040.7                | $9.0 \times 10^{-19}$ | 1             |
|                        | ELLVDLL                     | cyclic           | 1044.7                | $9.2 \times 10^{-16}$ | 1             |
|                        | ELLVDLL                     | cyclic           | 1050.7                | $2.1 \times 10^{-28}$ | 1             |
|                        | ELLVDLL                     | linear           | 1054.7                | $6.8 \times 10^{-16}$ | 1             |
|                        | ELLIDLL                     | cyclic           | 1057.7                | $7.8 \times 10^{-24}$ | 1             |
|                        | ELLVDLL                     | cyclic           | 1064.7                | $2.0 \times 10^{-41}$ | 1             |
|                        | ELLVDLL                     | linear           | 1068.7                | $6.4 \times 10^{-31}$ | 1             |
|                        | ELLVDLL                     | cyclic           | 1071.7                | $3.9 \times 10^{-22}$ | 1             |
| <b>Plipastatins</b>    | EOYTEAPQYI                  | cyclic           | 718.4                 | $9.6 \times 10^{-33}$ | 2             |
|                        | EOYTEAPQYI                  | cyclic           | 724.4                 | $2.9 \times 10^{-30}$ | 2             |
|                        | EOYTEAPQYI                  | cyclic           | 725.4                 | $2.5 \times 10^{-38}$ | 2             |
|                        | EOYTEAPQYI                  | cyclic           | 731.4                 | $7.0 \times 10^{-55}$ | 2             |
|                        | EOYTEAPQYI                  | cyclic           | 732.4                 | $2.3 \times 10^{-37}$ | 2             |
|                        | EOYTEVPQYI                  | cyclic           | 739.4                 | $3.2 \times 10^{-49}$ | 2             |
|                        | EOYTEVPQYI                  | cyclic           | 746.4                 | $5.5 \times 10^{-43}$ | 2             |
|                        | EOYTEVPQYI                  | cyclic           | 753.4                 | $6.1 \times 10^{-42}$ | 2             |
|                        | EOYTEVPQYI                  | cyclic           | 760.4                 | $2.6 \times 10^{-21}$ | 2             |

**Supplementary Table 11. Oligonucleotides used in this study.**

| Oligo    | Sequence                                            | Purpose                                                                 | Reference  |
|----------|-----------------------------------------------------|-------------------------------------------------------------------------|------------|
| PEB_317  | TTTGGGCTAACAGGAGGCTAGCAT_<br>ATGAGAATACCTGAAGGTTTCG | generating a fragment of <i>prtA</i> with<br>homologous arms to pCEP-km | this study |
| PEB_318  | TCTGCAGAGCTCGAGCATGCACAT_<br>CGTAATGAAACGAGTTCAGG   | verification of integration of<br>pCEP_ <i>prtA</i> -km into the genome | this study |
| PEB_319  | GACAGGGGTAATGCTAATGCC                               | verification of integration of<br>pCEP_ <i>prtA</i> -km into the genome | this study |
| VpCEP-fw | GCTATGCCATAGCATTTTTATCCAT<br>AAG                    | verification of integration of<br>pCEP_ <i>prtA</i> -km into the genome | 5          |

## Supplementary References

1. He, J. & Hertweck, C. Iteration as Programmed Event during Polyketide Assembly; Molecular Analysis of the Aureothin Biosynthesis Gene Cluster. *Chemistry and Biology* **10**, 1225–1232 (2003).
2. Wilkinson, B. *et al.* Novel octaketide macrolides related to 6-deoxyerythronolide B provide evidence for iterative operation of the erythromycin polyketide synthase. *Chemistry and Biology* **7**, 111–117 (2000).
3. Röttig, M. *et al.* NRPSpredictor2 - A web server for predicting NRPS adenylation domain specificity. *Nucleic Acids Research* **39**, 362–367 (2011).
4. Mohimani, H., Kim, S. & Pevzner, P. A. A new approach to evaluating statistical significance of spectral identifications. *Journal of Proteome Research* **12**, 1560–1568 (2013).
5. Bode, E. *et al.* Promoter Activation in  $\Delta$ hfq Mutants as an Efficient Tool for Specialized Metabolite Production Enabling Direct Bioactivity Testing. *Angewandte Chemie* **131**, 19133–19139 (2019).
6. Sandrin, C., Peypoux, F. & Michel, G. Coproduction of surfactin and iturin A, lipopeptides with surfactant and antifungal properties, by *Bacillus subtilis*. *Biotechnology and Applied Biochemistry* **12**, (1990).
7. Nishikiori, T., Naganawa, H., Muraoka, Y., Aoyagi, T. & Umezawa, H. Plipastatins: New inhibitors of phospholipase A2, produced by *Bacillus cereus* BMG302-fF67: II. structure of fatty acid residue and amino acid sequence. *The Journal of Antibiotics* **39**, 745–754 (1986).
8. Gao, L. *et al.* Plipastatin and surfactin coproduction by *Bacillus subtilis* pB2-L and their effects on microorganisms. *Antonie van Leeuwenhoek, International Journal of General and Molecular Microbiology* **110**, 1007–1018 (2017).
